# Supplementary material
Source: publisher figshare collection journal article supplement (https://springernature.figshare.com/ndownloader/files/11146229)
Supplement: Supplementary file 1 [file 11146229]

## Sheet: PatchedDepth_Calc
Exp	Site	Hole	Core	Type	Sect	A/W	Offset (cm)	Depth CSF-A (m)	Depth CCSF-A (m)	Comment 1	Comment 2	Comment 3	CSF-A (m)	CCSF-A (m)	CCSF-D_Patched_rev20160113 (m)	Out of Splice? (0 is in Splice)	H-C-S	SectionTopDepth (m CSF-A)	H-C	AffineOffset (m)	Offset from CCSF-A (m)
													<- Copy from N column								to V column ->
346	U1430	B	1	H	1		109			0	-	1	1.09	1.09	1.09	0	B-1-1	0	B-1	0	0
346	U1430	B	1	H	2		56			1	-	1	2.06	2.06	2.06	0	B-1-2	1.5	B-1	0	0
346	U1430	B	1	H	2		104			1	-	2	2.54	2.54	2.54	0	B-1-2	1.5	B-1	0	0
346	U1430	B	1	H	2		143.5			1	-	3	2.935	2.935	2.935	0	B-1-2	1.5	B-1	0	0
346	U1430	B	1	H	3		26			1	-	4	3.26	3.26	3.26	0	B-1-3	3	B-1	0	0
346	U1430	B	1	H	4		35			1	-	5	4.85	4.85	4.85	0	B-1-4	4.5	B-1	0	0
346	U1430	B	1	H	4		150			1	-	6	6	6	6	0	B-1-4	4.5	B-1	0	0
346	U1430	A	2	H	3		129			2	-	1	7.89	8.25036	8.25036	0	A-2-3	6.6	A-2	0.36036	0
346	U1430	A	2	H	4		65			2	-	2	8.75	9.11036	9.11036	Out of splice	A-2-4	8.1	A-2	0.36036	0
346	U1430	B	2	H	2		21			2	-	3	10.01	10.0263	10.0263	0	B-2-2	9.8	B-2	0.01628	0
346	U1430	B	2	H	2		82			2	-	4	10.62	10.6363	10.6363	0	B-2-2	9.8	B-2	0.01628	0
346	U1430	B	2	H	2		142			2	-	5	11.22	11.2363	11.2363	0	B-2-2	9.8	B-2	0.01628	0
346	U1430	B	2	H	3		80			2	-	6	12.1	12.1163	12.1163	0	B-2-3	11.3	B-2	0.01628	0
346	U1430	B	2	H	3		121.5			2	-	7	12.515	12.5313	12.5313	0	B-2-3	11.3	B-2	0.01628	0
346	U1430	B	2	H	3		147.5			2	-	8	12.775	12.7913	12.7913	0	B-2-3	11.3	B-2	0.01628	0
346	U1430	B	2	H	4		58			3	-	1	13.38	13.3963	13.3963	0	B-2-4	12.8	B-2	0.01628	0
346	U1430	B	2	H	5		14			3	-	2	14.44	14.4563	14.4563	0	B-2-5	14.3	B-2	0.01628	0
346	U1430	B	2	H	5		129.5			3	-	3	15.595	15.6113	15.6113	0	B-2-5	14.3	B-2	0.01628	0
346	U1430	A	3	H	3		37.5			4	-	1	16.475	17.4775	17.4775	0	A-3-3	16.1	A-3	1.00254	0
346	U1430	A	3	H	4		18			4	-	2	17.78	18.7825	18.7825	0	A-3-4	17.6	A-3	1.00254	0
346	U1430	B	3	H	2		108			5	-	1	20.38	20.8221	20.8221	0	B-3-2	19.3	B-3	0.442092	0
346	U1430	B	3	H	3		9			5	-	2	20.89	21.3321	21.3321	0	B-3-3	20.8	B-3	0.442092	0
346	U1430	B	3	H	3		133			5	-	3	22.13	22.5721	22.5721	0	B-3-3	20.8	B-3	0.442092	0
346	U1430	B	3	H	4		114			5	-	4	23.44	23.8821	23.8821	0	B-3-4	22.3	B-3	0.442092	0
346	U1430	B	3	H	4		143			6	-	1	23.73	24.1721	24.1721	0	B-3-4	22.3	B-3	0.442092	0
346	U1430	B	3	H	5		138			6	-	2	25.18	25.6221	25.6221	0	B-3-5	23.8	B-3	0.442092	0
346	U1430	B	3	H	6		114			6	-	3	26.44	26.8821	26.8821	0	B-3-6	25.3	B-3	0.442092	0
346	U1430	A	4	H	3		8			6	-	4	25.68	27.4949	27.4949	0	A-4-3	25.6	A-4	1.81489	0
346	U1430	B	4	H	2		32			7	-	1	29.12	30.0932	30.0932	0	B-4-2	28.8	B-4	0.973159	0
346	U1430	B	4	H	2		66			7	-	2	29.46	30.4332	30.4332	0	B-4-2	28.8	B-4	0.973159	0
346	U1430	B	4	H	2		147			7	-	3	30.27	31.2432	31.2432	0	B-4-2	28.8	B-4	0.973159	0
346	U1430	B	4	H	3		28			8	-	1	30.58	31.5532	31.5532	0	B-4-3	30.3	B-4	0.973159	0
346	U1430	B	4	H	3		58			8	-	2	30.88	31.8532	31.8532	0	B-4-3	30.3	B-4	0.973159	0
346	U1430	B	4	H	3		82			8	-	3	31.12	32.0932	32.0932	0	B-4-3	30.3	B-4	0.973159	0
346	U1430	B	4	H	3		101			9	-	1	31.31	32.2832	32.2832	0	B-4-3	30.3	B-4	0.973159	0
346	U1430	B	4	H	3		124			9	-	2	31.54	32.5132	32.5132	0	B-4-3	30.3	B-4	0.973159	0
346	U1430	B	4	H	4		60			9	-	3	32.4	33.3732	33.3732	0	B-4-4	31.8	B-4	0.973159	0
346	U1430	B	4	H	4		133			10	-	1	33.13	34.1032	34.1032	0	B-4-4	31.8	B-4	0.973159	0
346	U1430	B	4	H	5		83			10	-	2	34.13	35.1032	35.1032	0	B-4-5	33.3	B-4	0.973159	0
346	U1430	B	4	H	5		108			10	-	3	34.38	35.3532	35.3532	0	B-4-5	33.3	B-4	0.973159	0
346	U1430	B	4	H	6		34			11	-	1	35.14	36.1132	36.1132	0	B-4-6	34.8	B-4	0.973159	0
346	U1430	B	4	H	6		90			11	-	2	35.7	36.6732	36.6732	0	B-4-6	34.8	B-4	0.973159	0
346	U1430	A	5	H	3		94.5			12	-	1	36.045	37.9971	37.9971	0	A-5-3	35.1	A-5	1.9521	0
346	U1430	A	5	H	4		6			12	-	2	36.66	38.6121	38.6121	0	A-5-4	36.6	A-5	1.9521	0
346	U1430	A	5	H	4		36			13	-	1	36.96	38.9121	38.9121	0	A-5-4	36.6	A-5	1.9521	0
346	U1430	B	5	H	1		67.5			13	-	2	37.475	39.0564	39.0564	0	B-5-1	36.8	B-5	1.58138	0
346	U1430	B	5	H	1		98			13	-	3	37.78	39.3614	39.3614	0	B-5-1	36.8	B-5	1.58138	0
346	U1430	B	5	H	2		24.5			14	-	1	38.545	40.1264	40.1264	0	B-5-2	38.3	B-5	1.58138	0
346	U1430	B	5	H	2		36			14	-	2	38.66	40.2414	40.2414	0	B-5-2	38.3	B-5	1.58138	0
346	U1430	B	5	H	3		8			14	-	3	39.88	41.4614	41.4614	0	B-5-3	39.8	B-5	1.58138	0
346	U1430	B	5	H	3		54			15	-	1	40.34	41.9214	41.9214	0	B-5-3	39.8	B-5	1.58138	0
346	U1430	B	5	H	3		104			15	-	2	40.84	42.4214	42.4214	0	B-5-3	39.8	B-5	1.58138	0
346	U1430	B	5	H	4		7			16	-	1	41.37	42.9514	42.9514	0	B-5-4	41.3	B-5	1.58138	0
346	U1430	B	5	H	4		58.5			16	-	2	41.885	43.4664	43.4664	0	B-5-4	41.3	B-5	1.58138	0
346	U1430	B	5	H	5		40			16	-	3	43.2	44.7814	44.7814	0	B-5-5	42.8	B-5	1.58138	0
346	U1430	B	5	H	5		101			17	-	1	43.81	45.3914	45.3914	0	B-5-5	42.8	B-5	1.58138	0
346	U1430	B	5	H	6		41			17	-	2	44.71	46.2914	46.2914	0	B-5-6	44.3	B-5	1.58138	0
346	U1430	B	5	H	6		97.5			18	-	1	45.275	46.8564	46.8564	0	B-5-6	44.3	B-5	1.58138	0
346	U1430	A	6	H	3		63.5			18	-	2	45.235	47.6011	47.6011	0	A-6-3	44.6	A-6	2.36612	0
346	U1430	A	6	H	3		126			19	-	1	45.86	48.2261	48.2261	0	A-6-3	44.6	A-6	2.36612	0
346	U1430	A	6	H	4		25.5			19	-	2	46.355	48.7211	48.7211	0	A-6-4	46.1	A-6	2.36612	0
346	U1430	B	6	H	1		149			20	-	1	47.79	49.7978	49.7978	0	B-6-1	46.3	B-6	2.00782	0
346	U1430	B	6	H	2		19			21	-	1	47.99	49.9978	49.9978	0	B-6-2	47.8	B-6	2.00782	0
346	U1430	B	6	H	2		85			21	-	2	48.65	50.6578	50.6578	0	B-6-2	47.8	B-6	2.00782	0
346	U1430	B	1	H	1	A	0						0	0	0	0	B-1-1	0	B-1	0	0
346	U1430	B	1	H	1	A	0.5						0.005	0.005	0.005	0	B-1-1	0	B-1	0	0
346	U1430	B	1	H	1	A	1						0.01	0.01	0.01	0	B-1-1	0	B-1	0	0
346	U1430	A	28	H	3	A	75						243.87	259.057	257.987	0	A-28-3	243.12	A-28	15.1874	-1.07066
346	U1430	A	28	H	3	A	75.5						243.875	259.062	257.992	0	A-28-3	243.12	A-28	15.1874	-1.07066
346	U1430	A	28	H	3	A	76						243.88	259.067	257.997	Out of splice	A-28-3	243.12	A-28	15.1874	-1.07066

## Sheet: PatchedSpliceIntervals
Site	Hole	Core	Type	Section	Depth from top of the section (cm)	CSF-A (m)	CCSF-D (m)	CCSF-D_Patched_rev20160113 (m)	Splice Interval		(CSF-A)	Status below this depth	Offset from CCSF-A (m)
	A	1	H	1	0	0	0.21021	0.21021			-0.001	Out of splice	8.88178e-16
U1430	A	2	H	3	65.7994	7.25799	7.61835	7.61835	Shipboard2		7.25699		0
	A	2	H	4	64.3792	8.74379	9.10415	9.10415	Shipboard2		8.74279	Out of splice	0
U1430	A	3	H	2	133.191	15.9319	16.9345	16.9345	Shipboard4		15.9309		0
	A	3	H	4	38.9448	17.9894	18.992	18.992	Shipboard4		17.9884	Out of splice	0
U1430	A	4	H	2	112.153	25.2215	27.0364	27.0364	Shipboard6		25.2205		0
	A	4	H	4	11.5702	27.2157	29.0306	29.0306	Shipboard6		27.2147	Out of splice	0
U1430	A	5	H	2	116.895	34.7689	36.7211	36.7211	Shipboard8		34.7679		0
	A	5	H	4	41.5122	37.0151	38.9672	38.9672	Shipboard8		37.0141	Out of splice	0
U1430	A	6	H	3	32.7403	44.9274	47.2935	47.2935	Shipboard10		44.9264		0
	A	6	H	4	124.401	47.344	49.7101	49.7101	Shipboard10		47.343	Out of splice	0
U1430	A	7	H	2	125.012	53.8501	56.7735	56.7735	Shipboard12		53.8491		0
	A	7	H	4	41.0353	56.0104	58.9337	58.9337	Shipboard12		56.0094	Out of splice	0
U1430	A	8	H	2	93.3845	63.0338	66.4734	66.4734	Shipboard14		63.0328		0
	A	8	H	6	7.87808	68.1788	71.6184	71.6184	Shipboard14		68.1778	Out of splice	0
U1430	A	9	H	3	9.68617	73.1969	76.7495	76.7495	Shipboard16		73.1959		0
	A	9	H	4	132.447	75.9245	79.4771	79.4771	Shipboard16		75.9235	Out of splice	0
U1430	A	10	H	2	18.8109	81.2881	85.7349	85.7349	Shipboard18		81.2871		0
	A	10	H	4	111.017	85.2102	89.657	89.657	Shipboard18		85.2092	Out of splice	0
U1430	A	11	H	2	67.2	91.272	96.3432	96.5058	Shipboard20		91.271		0.162601
	A	11	H	5	9.24816	95.1925	100.264	100.426	Shipboard20		95.1915	Out of splice	0.162601
U1430	A	12	H	2	125.264	101.353	107.128	107.291	Shipboard22		101.352		0.162601
	A	12	H	4	107.711	104.177	109.953	110.115	Shipboard22		104.176	Out of splice	0.162601
U1430	A	13	H	2	81.8549	110.419	116.962	117.125	Shipboard24		110.418		0.162601
	A	13	H	4	48.3511	113.084	119.627	119.79	Shipboard24		113.083	Out of splice	0.162601
U1430	A	14	H	3	15.1686	120.752	127.701	127.864	Shipboard26		120.751		0.162601
	A	14	H	5	6.35517	123.664	130.613	130.776	Shipboard26		123.663	Out of splice	0.162601
U1430	A	15	H	3	1.73786	130.117	137.483	137.645	Shipboard28		130.116		0.162601
	A	15	H	4	136.589	132.966	140.331	140.494	Shipboard28		132.965	Out of splice	0.162601
U1430	A	16	H	2	9.22068	138.192	146.336	146.499	Shipboard30		138.191		0.162601
	A	16	H	5	16.5	142.765	150.909	151.072	Shipboard30		142.764	Out of splice	0.162601
U1430	A	17	H	3	1.66007	149.117	159.127	158.059	Shipboard32		149.116		-1.06802
	A	17	H	4	11.7145	150.737	160.748	159.68	Shipboard32		150.736	Out of splice	-1.06802
U1430	A	18	H	3	25.7368	158.857	169.007	167.939	Shipboard34		158.856		-1.06802
	A	18	H	4	127.594	161.376	171.525	170.457	Shipboard34		161.375	Out of splice	-1.06802
U1430	A	19	H	2	120	167.8	178.444	177.412	Shipboard36		167.799		-1.03192
	A	19	H	5	39.3355	171.493	182.137	181.105	Shipboard36		171.492	Out of splice	-1.03192
U1430	A	20	H	2	104.121	177.141	188.419	187.387	Shipboard38		177.14		-1.03193
	A	20	H	4	32.2341	179.422	190.7	189.668	Shipboard38		179.421	Out of splice	-1.03193
U1430	A	21	H	3	7.32335	186.573	198.54	197.508	Shipboard40		186.572		-1.03193
	A	21	H	6	11.7301	191.117	203.084	202.053	Shipboard40		191.116	Out of splice	-1.03193
U1430	A	22	H	2	132.4	195.824	209.037	207.923	Shipboard42		195.823		-1.11476
	A	22	H	6	49.7185	200.997	214.21	213.096	Shipboard42		200.996	Out of splice	-1.11476
U1430	A	23	H	3	126.449	206.464	219.997	218.882	Shipboard44		206.463		-1.11476
	A	23	H	6	15.2684	209.853	223.385	222.271	Shipboard44		209.852	Out of splice	-1.11476
U1430	A	24	H	3	103.222	215.732	229.658	228.543	Shipboard46		215.731		-1.11476
	A	24	H	6	19.2084	219.392	233.318	232.203	Shipboard46		219.391	Out of splice	-1.11476
U1430	A	25	H	3	66.1199	224.861	238.57	237.456	Shipboard48		224.86		-1.11476
	A	25	H	7	28.2495	230.002	243.712	242.597	Shipboard48		230.001	Out of splice	-1.11476
U1430	A	26	H	1	73.7202	231.437	246.041	245.002	Shipboard50		231.436		-1.03839
	A	26	H	4	3.65041	234.957	249.56	248.522	Shipboard50		234.956	Out of splice	-1.03839
U1430	A	27	H	2	82.3885	237.724	252.336	251.298	Shipboard52		237.723		-1.03839
	A	27	H	3	120.226	239.602	254.215	253.176	Shipboard52		239.601	Out of splice	-1.03839
U1430	A	28	H	2	40.2	242.002	257.189	256.119	Shipboard54		242.001		-1.07066
	A	28	H	3	76	243.88	259.067	257.997	Shipboard54		243.879	Out of splice	-1.07066
U1430	B	1	H	1	0	0	0	0	Shipboard1		-0.001		0
	B	1	H	6	11.8354	7.61835	7.61835	7.61835	Shipboard1		7.61735	Out of splice	0
U1430	B	2	H	1	78.7872	9.08787	9.10415	9.10415	Shipboard3		9.08687		0
	B	2	H	6	111.817	16.9182	16.9345	16.9345	Shipboard3		16.9172	Out of splice	0
U1430	B	3	H	1	74.9897	18.5499	18.992	18.992	Shipboard5		18.5489		0
	B	3	H	6	129.433	26.5943	27.0364	27.0364	Shipboard5		26.5933	Out of splice	0
U1430	B	4	H	1	75.7431	28.0574	29.0306	29.0306	Shipboard7		28.0564		0
	B	4	H	6	94.7891	35.7479	36.7211	36.7211	Shipboard7		35.7469	Out of splice	0
U1430	B	5	H	1	58.5848	37.3858	38.9672	38.9672	Shipboard9		37.3848		0
	B	5	H	7	10.2142	45.7121	47.2935	47.2935	Shipboard9		45.7111	Out of splice	0
U1430	B	6	H	1	140.23	47.7023	49.7101	49.7101	Shipboard11		47.7013		0
	B	6	H	6	96.5663	54.7657	56.7735	56.7735	Shipboard11		54.7647	Out of splice	0
U1430	B	7	H	1	69.3743	56.4937	58.9337	58.9337	Shipboard13		56.4927		0
	B	7	H	6	73.3439	64.0334	66.4734	66.4734	Shipboard13		64.0324	Out of splice	0
U1430	B	8	H	3	29.7931	68.5979	71.6184	71.6184	Shipboard15		68.5969		0
	B	8	H	6	92.9027	73.729	76.7495	76.7495	Shipboard15		73.728	Out of splice	0
U1430	B	9	H	1	137.053	76.1705	79.4771	79.4771	Shipboard17		76.1695		0
	B	9	H	6	12.836	82.4284	85.7349	85.7349	Shipboard17		82.4274	Out of splice	0
U1430	B	10	H	1	113.118	85.4312	89.657	89.657	Shipboard19		85.4302		0
	B	10	H	6	48	92.28	96.5058	96.5058	Shipboard19		92.279	Out of splice	0
U1430	B	11	H	2	21.883	95.5188	100.264	100.426	Shipboard21		95.5178		0.162601
	B	11	H	6	108.336	102.383	107.128	107.291	Shipboard21		102.382	Out of splice	0.162601
U1430	B	12	H	1	135.569	104.656	109.953	110.115	Shipboard23		104.655		0.162601
	B	12	H	6	86.5154	111.665	116.962	117.125	Shipboard23		111.664	Out of splice	0.162601
U1430	B	13	H	1	86.9029	113.669	119.627	119.79	Shipboard25		113.668		0.162601
	B	13	H	6	144.332	121.743	127.701	127.864	Shipboard25		121.742	Out of splice	0.162601
U1430	B	14	H	2	21.8395	124.018	130.613	130.776	Shipboard27		124.017		0.162601
	B	14	H	6	108.802	130.888	137.483	137.645	Shipboard27		130.887	Out of splice	0.162601
U1430	B	15	H	1	136.729	133.167	140.331	140.494	Shipboard29		133.166		0.162601
	B	15	H	5	137.239	139.172	146.336	146.499	Shipboard29		139.171	Out of splice	0.162601
U1430	B	16	H	2	51.9	143.319	152.14	151.072	Shipboard31		143.318		-1.06802
	B	16	H	7	0.655767	150.307	159.127	158.059	Shipboard31		150.306	Out of splice	-1.06802
U1430	B	17	H	1	79.9433	151.599	160.748	159.68	Shipboard33		151.598		-1.06802
	B	17	H	7	5.79933	159.858	169.007	167.939	Shipboard33		159.857	Out of splice	-1.06802
U1430	B	18	H	1	130.346	161.603	171.525	170.457	Shipboard35		161.602		-1.06802
	B	18	H	6	75.8	168.558	178.48	177.412	Shipboard35		168.557	Out of splice	-1.06802
U1430	B	19	H	2	79.1453	172.091	182.137	181.105	Shipboard37		172.09		-1.03193
	B	19	H	7	7.33137	178.373	188.419	187.387	Shipboard37		178.372	Out of splice	-1.03193
U1430	B	20	H	1	65.4078	179.954	190.7	189.668	Shipboard39		179.953		-1.03193
	B	20	H	6	99.4578	187.795	198.54	197.508	Shipboard39		187.794	Out of splice	-1.03193
U1430	B	21	H	2	4.50089	190.345	203.084	202.053	Shipboard41		190.344		-1.03193
	B	21	H	5	141.5	196.215	208.954	207.923	Shipboard41		196.214	Out of splice	-1.03193
U1430	B	22	H	3	13.5218	201.435	214.21	213.096	Shipboard43		201.434		-1.11476
	B	22	H	6	142.181	207.222	219.997	218.882	Shipboard43		207.221	Out of splice	-1.11476
U1430	B	23	H	2	87.3728	210.174	223.385	222.271	Shipboard45		210.173		-1.11476
	B	23	H	6	114.613	216.446	229.658	228.543	Shipboard45		216.445	Out of splice	-1.11476
U1430	B	24	H	3	2.64237	220.326	233.318	232.203	Shipboard47		220.325		-1.11476
	B	24	H	6	77.9155	225.579	238.57	237.456	Shipboard47		225.578	Out of splice	-1.11476
U1430	B	25	H	3	93.7	230.737	243.635	242.597	Shipboard49		230.736		-1.03839
	B	25	H	5	34.2571	233.143	246.041	245.002	Shipboard49		233.142	Out of splice	-1.03839
U1430	B	26	H	2	26.6066	236.366	249.56	248.522	Shipboard51		236.365		-1.03839
	B	26	H	4	42.2464	239.142	252.336	251.298	Shipboard51		239.141	Out of splice	-1.03839
U1430	B	27	H	1	131.471	240.615	254.215	253.176	Shipboard53		240.614		-1.03839
	B	27	H	4	13.7	243.557	257.157	256.119	Shipboard53		243.556	Out of splice	-1.03839

## Sheet: AffineTable
Hole	Core	Type	H-C	Vertical offset (m)
A	1	H	A-1	0.21021
A	2	H	A-2	0.36036
A	3	H	A-3	1.00254
A	4	H	A-4	1.81489
A	5	H	A-5	1.9521
A	6	H	A-6	2.36612
A	7	H	A-7	2.92337
A	8	H	A-8	3.43957
A	9	H	A-9	3.55259
A	10	H	A-10	4.44678
A	11	H	A-11	5.07118
A	12	H	A-12	5.77555
A	13	H	A-13	6.54358
A	14	H	A-14	6.9497
A	15	H	A-15	7.3655
A	16	H	A-16	8.14428
A	17	H	A-17	10.0109
A	18	H	A-18	10.1492
A	19	H	A-19	10.6436
A	20	H	A-20	11.2776
A	21	H	A-21	11.9672
A	22	H	A-22	13.2133
A	23	H	A-23	13.5326
A	24	H	A-24	13.9255
A	25	H	A-25	13.7091
A	26	H	A-26	14.6036
A	27	H	A-27	14.6126
A	28	H	A-28	15.1874
A	29	H	A-29	15.1292
A	30	X	A-30	15.1292
A	31	X	A-31	15.1292
A	32	X	A-32	15.1292
B	1	H	B-1	0
B	2	H	B-2	0.01628
B	3	H	B-3	0.442092
B	4	H	B-4	0.973159
B	5	H	B-5	1.58138
B	6	H	B-6	2.00782
B	7	H	B-7	2.43998
B	8	H	B-8	3.02042
B	9	H	B-9	3.30653
B	10	H	B-10	4.22578
B	11	H	B-11	4.74483
B	12	H	B-12	5.29697
B	13	H	B-13	5.95806
B	14	H	B-14	6.59486
B	15	H	B-15	7.1641
B	16	H	B-16	8.8209
B	17	H	B-17	9.14857
B	18	H	B-18	9.92167
B	19	H	B-19	10.0455
B	20	H	B-20	10.7458
B	21	H	B-21	12.7395
B	22	H	B-22	12.7753
B	23	H	B-23	13.2116
B	24	H	B-24	12.9911
B	25	H	B-25	12.8982
B	26	H	B-26	13.194
B	27	H	B-27	13.6002
B	28	H	B-28	16.3375
B	29	X	B-29	16.3375
B	30	X	B-30	16.3375
B	31	X	B-31	16.3375
B	32	X	B-32	16.3375
B	33	X	B-33	16.3375
B	34	X	B-34	16.3375
B	35	X	B-35	16.3375
B	36	X	B-36	16.3375
B	37	H	B-37	16.3375
C	1	H	C-1	0.112528
C	2	H	C-2	0.225056
C	3	H	C-3	0.835582
C	4	H	C-4	0.866901
C	5	H	C-5	0.773125
C	6	H	C-6	3.1031
C	7	H	C-7	4.14354
C	8	H	C-8	4.6454
C	9	H	C-9	5.05961
C	10	H	C-10	5.96148
C	11	H	C-11	6.75955
C	12	H	C-12	7.47084
C	13	H	C-13	8.12413
C	14	H	C-14	8.79419
C	15	H	C-15	9.06045
C	16	H	C-16	10.4831
C	17	H	C-17	11.3717
C	18	H	C-18	11.4008
C	19	H	C-19	11.697
C	20	H	C-20	12.3331
C	21	H	C-21	13.3722
C	22	H	C-22	14.8822
C	23	H	C-23	14.9939
C	24	H	C-24	15.2124
C	25	H	C-25	14.8531
C	26	X	C-26	15.4601
C	27	X	C-27	15.4601
C	28	H	C-28	15.5814
C	29	H	C-29	15.8873
C	30	H	C-30	16.2903
C	31	H	C-31	16.2903
C	32	H	C-32	16.7759
C	33	H	C-33	16.7759
C	34	H	C-34	16.7759

## Sheet: SectionSummary
Exp	Site	Hole	Core	Type	Sect	Recovered length (m)	Curated length (m)	H-C-S	Top depth CSF-A (m)	Bottom depth CSF-A (m)	Top depth CSF-B (m)	Bottom depth CSF-B (m)	Catwalk samples (no.)	Section half samples (no.)	Comments
346	U1430	A	1	H	1	1.5	1.5	A-1-1	0	1.5	0	1.5	5	2
346	U1430	A	1	H	2	1.4	1.4	A-1-2	1.5	2.9	0.78	1.5	1	6
346	U1430	A	1	H	3	0.57	0.57	A-1-3	2.9	3.47	2.42	2.9	0	2
346	U1430	A	1	H	CC	0.11	0.11	A-1-CC	3.47	3.58	3.36	3.47	1	0
346	U1430	A	10	H	1	1.5	1.5	A-10-1	79.6	81.1	79.6	81.1	3	4
346	U1430	A	10	H	2	1.5	1.5	A-10-2	81.1	82.6	80.35	81.1	1	8
346	U1430	A	10	H	3	1.5	1.5	A-10-3	82.6	84.1	81.6	82.6	0	5
346	U1430	A	10	H	4	1.5	1.5	A-10-4	84.1	85.6	82.98	84.1	0	6
346	U1430	A	10	H	5	1.5	1.5	A-10-5	85.6	87.1	84.4	85.6	0	2
346	U1430	A	10	H	6	1.5	1.5	A-10-6	87.1	88.6	85.85	87.1	0	2
346	U1430	A	10	H	7	0.5	0.5	A-10-7	88.6	89.1	88.13	88.6	0	2
346	U1430	A	10	H	CC	0.41	0.41	A-10-CC	89.1	89.51	88.71	89.1	1	0
346	U1430	A	11	H	1	1.5	1.5	A-11-1	89.1	90.6	89.1	90.6	0	2
346	U1430	A	11	H	2	1.5	1.5	A-11-2	90.6	92.1	89.85	90.6	1	5
346	U1430	A	11	H	3	1.5	1.5	A-11-3	92.1	93.6	91.1	92.1	0	7
346	U1430	A	11	H	4	1.5	1.5	A-11-4	93.6	95.1	92.48	93.6	0	5
346	U1430	A	11	H	5	1.5	1.5	A-11-5	95.1	96.6	93.9	95.1	0	4
346	U1430	A	11	H	6	1.5	1.5	A-11-6	96.6	98.1	95.35	96.6	0	0
346	U1430	A	11	H	7	0.54	0.54	A-11-7	98.1	98.64	97.59	98.1	0	2
346	U1430	A	11	H	CC	0.25	0.25	A-11-CC	98.64	98.89	98.36	98.6	1	0
346	U1430	A	12	H	1	1.5	1.5	A-12-1	98.6	100.1	98.6	100.1	3	2
346	U1430	A	12	H	2	1.5	1.5	A-12-2	100.1	101.6	99.35	100.1	1	4
346	U1430	A	12	H	3	1.5	1.5	A-12-3	101.6	103.1	100.6	101.6	0	4
346	U1430	A	12	H	4	1.5	1.5	A-12-4	103.1	104.6	101.98	103.1	0	7
346	U1430	A	12	H	5	1.5	1.5	A-12-5	104.6	106.1	103.4	104.6	0	1
346	U1430	A	12	H	6	1.5	1.5	A-12-6	106.1	107.6	104.85	106.1	0	0
346	U1430	A	12	H	7	0.64	0.64	A-12-7	107.6	108.24	107	107.6	0	2
346	U1430	A	12	H	CC	0.22	0.22	A-12-CC	108.24	108.46	107.89	108.1	1	0
346	U1430	A	13	H	1	1.5	1.5	A-13-1	108.1	109.6	108.1	109.6	0	3
346	U1430	A	13	H	2	1.5	1.5	A-13-2	109.6	111.1	108.85	109.6	1	4
346	U1430	A	13	H	3	1.5	1.5	A-13-3	111.1	112.6	110.1	111.1	0	5
346	U1430	A	13	H	4	1.5	1.5	A-13-4	112.6	114.1	111.48	112.6	0	3
346	U1430	A	13	H	5	1.5	1.5	A-13-5	114.1	115.6	112.9	114.1	0	2
346	U1430	A	13	H	6	1.5	1.5	A-13-6	115.6	117.1	114.35	115.6	0	1
346	U1430	A	13	H	7	0.53	0.53	A-13-7	117.1	117.63	116.6	117.1	0	1
346	U1430	A	13	H	CC	0.35	0.35	A-13-CC	117.63	117.98	117.26	117.6	1	0
346	U1430	A	14	H	1	1.5	1.5	A-14-1	117.6	119.1	117.6	119.1	3	2
346	U1430	A	14	H	2	1.5	1.5	A-14-2	119.1	120.6	118.35	119.1	1	3
346	U1430	A	14	H	3	1.5	1.5	A-14-3	120.6	122.1	119.6	120.6	0	5
346	U1430	A	14	H	4	1.5	1.5	A-14-4	122.1	123.6	120.98	122.1	0	5
346	U1430	A	14	H	5	1.5	1.5	A-14-5	123.6	125.1	122.4	123.6	0	6
346	U1430	A	14	H	6	1.5	1.5	A-14-6	125.1	126.6	123.85	125.1	0	0
346	U1430	A	14	H	7	0.64	0.64	A-14-7	126.6	127.24	126	126.6	0	1
346	U1430	A	14	H	CC	0.23	0.23	A-14-CC	127.24	127.47	126.88	127.1	1	0
346	U1430	A	15	H	1	1.5	1.5	A-15-1	127.1	128.6	127.1	128.6	0	0
346	U1430	A	15	H	2	1.5	1.5	A-15-2	128.6	130.1	127.85	128.6	1	4
346	U1430	A	15	H	3	1.5	1.5	A-15-3	130.1	131.6	129.1	130.1	0	4
346	U1430	A	15	H	4	1.49	1.49	A-15-4	131.6	133.09	130.48	131.6	0	8
346	U1430	A	15	H	5	1.5	1.5	A-15-5	133.09	134.59	131.89	133.09	0	1
346	U1430	A	15	H	6	1.5	1.5	A-15-6	134.59	136.09	133.34	134.59	0	1
346	U1430	A	15	H	7	0.65	0.65	A-15-7	136.09	136.74	135.48	136.09	0	1
346	U1430	A	15	H	CC	0.22	0.22	A-15-CC	136.74	136.96	136.39	136.6	1	0
346	U1430	A	16	H	1	1.5	1.5	A-16-1	136.6	138.1	136.6	138.1	3	3
346	U1430	A	16	H	2	1.5	1.5	A-16-2	138.1	139.6	137.35	138.1	1	8
346	U1430	A	16	H	3	1.5	1.5	A-16-3	139.6	141.1	138.6	139.6	0	6
346	U1430	A	16	H	4	1.5	1.5	A-16-4	141.1	142.6	139.98	141.1	0	7
346	U1430	A	16	H	5	1.5	1.5	A-16-5	142.6	144.1	141.4	142.6	0	7
346	U1430	A	16	H	6	1.5	1.5	A-16-6	144.1	145.6	142.85	144.1	0	2
346	U1430	A	16	H	7	0.67	0.67	A-16-7	145.6	146.27	144.98	145.6	0	1
346	U1430	A	16	H	CC	0.25	0.25	A-16-CC	146.27	146.52	145.86	146.1	1	0
346	U1430	A	17	H	1	1.5	1.5	A-17-1	146.1	147.6	146.1	147.6	0	3
346	U1430	A	17	H	2	1.5	1.5	A-17-2	147.6	149.1	146.85	147.6	1	5
346	U1430	A	17	H	3	1.52	1.52	A-17-3	149.1	150.62	148.09	149.1	0	8
346	U1430	A	17	H	4	1.5	1.5	A-17-4	150.62	152.12	149.49	150.62	0	2
346	U1430	A	17	H	5	1.5	1.5	A-17-5	152.12	153.62	150.92	152.12	0	3
346	U1430	A	17	H	6	1.5	1.5	A-17-6	153.62	155.12	152.37	153.62	0	2
346	U1430	A	17	H	7	0.65	0.65	A-17-7	155.12	155.77	154.51	155.12	0	1
346	U1430	A	17	H	CC	0.24	0.24	A-17-CC	155.77	156.01	155.37	155.6	1	0
346	U1430	A	18	H	1	1.5	1.5	A-18-1	155.6	157.1	155.6	157.1	3	0
346	U1430	A	18	H	2	1.5	1.5	A-18-2	157.1	158.6	156.35	157.1	1	4
346	U1430	A	18	H	3	1.5	1.5	A-18-3	158.6	160.1	157.6	158.6	0	4
346	U1430	A	18	H	4	1.5	1.5	A-18-4	160.1	161.6	158.98	160.1	0	7
346	U1430	A	18	H	5	1.5	1.5	A-18-5	161.6	163.1	160.4	161.6	0	2
346	U1430	A	18	H	6	1.24	1.24	A-18-6	163.1	164.34	162.04	163.1	0	2
346	U1430	A	18	H	7	0.76	0.76	A-18-7	164.34	165.1	163.64	164.34	0	1
346	U1430	A	18	H	CC	0.05	0.05	A-18-CC	165.1	165.15	165.05	165.1	1	0	ALL CC TO PAL
346	U1430	A	19	H	1	1.5	1.5	A-19-1	165.1	166.6	165.1	166.6	1	2
346	U1430	A	19	H	2	1.5	1.5	A-19-2	166.6	168.1	165.85	166.6	0	3
346	U1430	A	19	H	3	1.5	1.5	A-19-3	168.1	169.6	167.1	168.1	0	6
346	U1430	A	19	H	4	1.5	1.5	A-19-4	169.6	171.1	168.48	169.6	0	6
346	U1430	A	19	H	5	1.5	1.5	A-19-5	171.1	172.6	169.9	171.1	0	6
346	U1430	A	19	H	6	1.5	1.5	A-19-6	172.6	174.1	171.35	172.6	0	2
346	U1430	A	19	H	7	0.67	0.67	A-19-7	174.1	174.77	173.48	174.1	0	2
346	U1430	A	19	H	CC	0.24	0.24	A-19-CC	174.77	175.01	174.37	174.6	1	0
346	U1430	A	2	H	1	1.5	1.5	A-2-1	3.6	5.1	3.6	5.1	3	2
346	U1430	A	2	H	2	1.5	1.5	A-2-2	5.1	6.6	4.35	5.1	1	3
346	U1430	A	2	H	3	1.5	1.5	A-2-3	6.6	8.1	5.6	6.6	0	9
346	U1430	A	2	H	4	1.5	1.5	A-2-4	8.1	9.6	6.98	8.1	1	7
346	U1430	A	2	H	5	1.5	1.5	A-2-5	9.6	11.1	8.4	9.6	1	2
346	U1430	A	2	H	6	1.5	1.5	A-2-6	11.1	12.6	9.85	11.1	0	4
346	U1430	A	2	H	7	0.56	0.56	A-2-7	12.6	13.16	12.07	12.6	0	1
346	U1430	A	2	H	CC	0.17	0.17	A-2-CC	13.16	13.33	12.93	13.1	1	0
346	U1430	A	20	H	1	1.5	1.5	A-20-1	174.6	176.1	174.6	176.1	3	0
346	U1430	A	20	H	2	1.5	1.5	A-20-2	176.1	177.6	175.35	176.1	1	6
346	U1430	A	20	H	3	1.5	1.5	A-20-3	177.6	179.1	176.6	177.6	0	8
346	U1430	A	20	H	4	1.5	1.5	A-20-4	179.1	180.6	177.98	179.1	0	3
346	U1430	A	20	H	5	1.5	1.5	A-20-5	180.6	182.1	179.4	180.6	0	3
346	U1430	A	20	H	6	1.17	1.17	A-20-6	182.1	183.27	181.09	182.1	1	1
346	U1430	A	20	H	CC	0.26	0.26	A-20-CC	183.27	183.53	183.02	183.27	1	0
346	U1430	A	21	H	1	1.5	1.5	A-21-1	183.5	185	183.5	185	0	3
346	U1430	A	21	H	2	1.5	1.5	A-21-2	185	186.5	184.25	185	1	2
346	U1430	A	21	H	3	1.5	1.5	A-21-3	186.5	188	185.5	186.5	0	7
346	U1430	A	21	H	4	1.5	1.5	A-21-4	188	189.5	186.88	188	0	7
346	U1430	A	21	H	5	1.5	1.5	A-21-5	189.5	191	188.3	189.5	0	8
346	U1430	A	21	H	6	1.02	1.02	A-21-6	191	192.02	190.1	191	0	5
346	U1430	A	21	H	7	0.68	0.68	A-21-7	192.02	192.7	191.39	192.02	0	1
346	U1430	A	21	H	CC	0.25	0.25	A-21-CC	192.7	192.95	192.46	192.7	1	0
346	U1430	A	22	H	1	1.5	1.5	A-22-1	193	194.5	193	194.5	3	0
346	U1430	A	22	H	2	1.5	1.5	A-22-2	194.5	196	193.75	194.5	1	9
346	U1430	A	22	H	3	1.5	1.5	A-22-3	196	197.5	195	196	0	10
346	U1430	A	22	H	4	1.5	1.5	A-22-4	197.5	199	196.38	197.5	0	6
346	U1430	A	22	H	5	1.5	1.5	A-22-5	199	200.5	197.8	199	0	9
346	U1430	A	22	H	6	1.02	1.02	A-22-6	200.5	201.52	199.6	200.5	0	6
346	U1430	A	22	H	7	0.53	0.53	A-22-7	201.52	202.05	201.02	201.52	0	1
346	U1430	A	22	H	CC	0.2	0.2	A-22-CC	202.05	202.25	201.86	202.05	1	0
346	U1430	A	23	H	1	1.5	1.5	A-23-1	202.2	203.7	202.2	203.7	1	1
346	U1430	A	23	H	2	1.5	1.5	A-23-2	203.7	205.2	202.95	203.7	1	3
346	U1430	A	23	H	3	1.5	1.5	A-23-3	205.2	206.7	204.2	205.2	0	3
346	U1430	A	23	H	4	1.5	1.5	A-23-4	206.7	208.2	205.58	206.7	0	7
346	U1430	A	23	H	5	1.5	1.5	A-23-5	208.2	209.7	207	208.2	0	12
346	U1430	A	23	H	6	1.5	1.5	A-23-6	209.7	211.2	208.45	209.7	0	5
346	U1430	A	23	H	7	0.61	0.61	A-23-7	211.2	211.81	210.63	211.2	0	1
346	U1430	A	23	H	CC	0.05	0.05	A-23-CC	211.81	211.86	211.65	211.7	1	0	ALL CC TO PAL
346	U1430	A	24	H	1	1.5	1.5	A-24-1	211.7	213.2	211.7	213.2	1	0
346	U1430	A	24	H	2	1.5	1.5	A-24-2	213.2	214.7	212.45	213.2	1	5
346	U1430	A	24	H	3	1.5	1.5	A-24-3	214.7	216.2	213.7	214.7	0	5
346	U1430	A	24	H	4	1.5	1.5	A-24-4	216.2	217.7	215.08	216.2	0	8
346	U1430	A	24	H	5	1.5	1.5	A-24-5	217.7	219.2	216.5	217.7	0	19
346	U1430	A	24	H	6	1.5	1.5	A-24-6	219.2	220.7	217.95	219.2	0	5
346	U1430	A	24	H	7	0.61	0.61	A-24-7	220.7	221.31	220.13	220.7	0	1
346	U1430	A	24	H	CC	0.17	0.17	A-24-CC	221.31	221.48	221.04	221.2	1	0
346	U1430	A	25	H	1	1.5	1.5	A-25-1	221.2	222.7	221.2	222.7	1	4
346	U1430	A	25	H	2	1.5	1.5	A-25-2	222.7	224.2	221.95	222.7	1	6
346	U1430	A	25	H	3	1.5	1.5	A-25-3	224.2	225.7	223.2	224.2	0	5
346	U1430	A	25	H	4	1.5	1.5	A-25-4	225.7	227.2	224.58	225.7	0	9
346	U1430	A	25	H	5	1.5	1.5	A-25-5	227.2	228.7	226	227.2	0	9
346	U1430	A	25	H	6	1.02	1.02	A-25-6	228.7	229.72	227.8	228.7	0	9
346	U1430	A	25	H	7	0.72	0.72	A-25-7	229.72	230.44	229.06	229.72	0	5
346	U1430	A	25	H	CC	0.26	0.26	A-25-CC	230.44	230.7	230.19	230.44	1	1
346	U1430	A	26	H	1	1.5	1.5	A-26-1	230.7	232.2	230.7	232.2	1	3
346	U1430	A	26	H	2	1.5	1.5	A-26-2	232.2	233.7	231.45	232.2	1	10
346	U1430	A	26	H	3	1.22	1.22	A-26-3	233.7	234.92	232.83	233.7	0	4
346	U1430	A	26	H	4	0.51	0.51	A-26-4	234.92	235.43	234.46	234.92	0	2
346	U1430	A	26	H	CC	0.26	0.26	A-26-CC	235.43	235.69	235.16	235.4	1	0
346	U1430	A	27	H	1	1.5	1.5	A-27-1	235.4	236.9	235.4	236.9	0	0
346	U1430	A	27	H	2	1.5	1.5	A-27-2	236.9	238.4	236.15	236.9	1	4
346	U1430	A	27	H	3	1.23	1.23	A-27-3	238.4	239.63	237.53	238.4	0	9
346	U1430	A	27	H	4	0.5	0.5	A-27-4	239.63	240.13	239.18	239.63	0	0
346	U1430	A	27	H	CC	0.3	0.3	A-27-CC	240.13	240.43	239.82	240.1	1	0
346	U1430	A	28	H	1	1.5	1.5	A-28-1	240.1	241.6	240.1	241.6	2	3
346	U1430	A	28	H	2	1.52	1.52	A-28-2	241.6	243.12	240.84	241.6	1	11
346	U1430	A	28	H	3	1.2	1.2	A-28-3	243.12	244.32	242.26	243.12	0	3
346	U1430	A	28	H	4	0.49	0.49	A-28-4	244.32	244.81	243.88	244.32	0	0
346	U1430	A	28	H	CC	0.3	0.3	A-28-CC	244.81	245.11	244.52	244.8	1	0
346	U1430	A	29	H	1	1.5	1.5	A-29-1	244.8	246.3	244.8	246.3	0	3
346	U1430	A	29	H	2	1.5	1.5	A-29-2	246.3	247.8	245.55	246.3	1	1
346	U1430	A	29	H	3	1.5	1.5	A-29-3	247.8	249.3	246.8	247.8	0	1
346	U1430	A	29	H	CC	0.25	0.25	A-29-CC	249.3	249.55	249.06	249.3	1	0
346	U1430	A	3	H	1	1.5	1.5	A-3-1	13.1	14.6	13.1	14.6	3	1
346	U1430	A	3	H	2	1.5	1.5	A-3-2	14.6	16.1	13.85	14.6	1	9
346	U1430	A	3	H	3	1.5	1.5	A-3-3	16.1	17.6	15.1	16.1	0	10
346	U1430	A	3	H	4	1.5	1.5	A-3-4	17.6	19.1	16.48	17.6	1	7
346	U1430	A	3	H	5	1.5	1.5	A-3-5	19.1	20.6	17.9	19.1	1	5
346	U1430	A	3	H	6	1.5	1.5	A-3-6	20.6	22.1	19.35	20.6	0	4
346	U1430	A	3	H	7	0.55	0.55	A-3-7	22.1	22.65	21.58	22.1	0	1
346	U1430	A	3	H	CC	0.28	0.28	A-3-CC	22.65	22.93	22.33	22.6	1	1
346	U1430	A	30	X	CC	0.23	0.23	A-30-CC	249.5	249.73	249.5	249.73	1	1	Hard rock at bottom
346	U1430	A	31	X	CC	0.34	0.34	A-31-CC	255	255.34	255	255.34	2	0
346	U1430	A	32	X	CC	0.55	0.55	A-32-CC	264.7	265.25	264.7	265.25	1	3
346	U1430	A	4	H	1	1.5	1.5	A-4-1	22.6	24.1	22.6	24.1	3	4
346	U1430	A	4	H	2	1.5	1.5	A-4-2	24.1	25.6	23.35	24.1	1	4
346	U1430	A	4	H	3	1.5	1.5	A-4-3	25.6	27.1	24.6	25.6	0	12
346	U1430	A	4	H	4	1.5	1.5	A-4-4	27.1	28.6	25.98	27.1	1	4
346	U1430	A	4	H	5	1.5	1.5	A-4-5	28.6	30.1	27.4	28.6	1	2
346	U1430	A	4	H	6	1.12	1.12	A-4-6	30.1	31.22	29.13	30.1	0	1
346	U1430	A	4	H	7	0.72	0.72	A-4-7	31.22	31.94	30.56	31.22	0	4
346	U1430	A	4	H	CC	0.28	0.28	A-4-CC	31.94	32.22	31.67	31.94	1	1
346	U1430	A	5	H	1	1.5	1.5	A-5-1	32.1	33.6	32.1	33.6	3	2
346	U1430	A	5	H	2	1.5	1.5	A-5-2	33.6	35.1	32.85	33.6	1	9
346	U1430	A	5	H	3	1.5	1.5	A-5-3	35.1	36.6	34.1	35.1	0	18
346	U1430	A	5	H	4	1.5	1.5	A-5-4	36.6	38.1	35.48	36.6	0	10
346	U1430	A	5	H	5	1.5	1.5	A-5-5	38.1	39.6	36.9	38.1	0	1
346	U1430	A	5	H	6	1.5	1.5	A-5-6	39.6	41.1	38.35	39.6	0	4
346	U1430	A	5	H	7	0.64	0.64	A-5-7	41.1	41.74	40.5	41.1	0	1
346	U1430	A	5	H	CC	0.36	0.36	A-5-CC	41.74	42.1	41.26	41.6	1	1
346	U1430	A	6	H	1	1.5	1.5	A-6-1	41.6	43.1	41.6	43.1	4	4
346	U1430	A	6	H	2	1.5	1.5	A-6-2	43.1	44.6	42.35	43.1	1	3
346	U1430	A	6	H	3	1.5	1.5	A-6-3	44.6	46.1	43.6	44.6	0	17
346	U1430	A	6	H	4	1.5	1.5	A-6-4	46.1	47.6	44.98	46.1	0	14
346	U1430	A	6	H	5	1.5	1.5	A-6-5	47.6	49.1	46.4	47.6	0	3
346	U1430	A	6	H	6	1.5	1.5	A-6-6	49.1	50.6	47.85	49.1	0	2
346	U1430	A	6	H	7	0.59	0.59	A-6-7	50.6	51.19	50.05	50.6	0	2
346	U1430	A	6	H	CC	0.23	0.23	A-6-CC	51.19	51.42	50.88	51.1	1	3
346	U1430	A	7	H	1	1.5	1.5	A-7-1	51.1	52.6	51.1	52.6	3	2
346	U1430	A	7	H	2	1.5	1.5	A-7-2	52.6	54.1	51.85	52.6	1	6
346	U1430	A	7	H	3	1.5	1.5	A-7-3	54.1	55.6	53.1	54.1	0	18
346	U1430	A	7	H	4	1.5	1.5	A-7-4	55.6	57.1	54.48	55.6	0	8
346	U1430	A	7	H	5	1.5	1.5	A-7-5	57.1	58.6	55.9	57.1	0	3
346	U1430	A	7	H	6	1.5	1.5	A-7-6	58.6	60.1	57.35	58.6	0	3
346	U1430	A	7	H	7	0.59	0.59	A-7-7	60.1	60.69	59.55	60.1	0	2
346	U1430	A	7	H	CC	0.36	0.36	A-7-CC	60.69	61.05	60.26	60.6	1	0
346	U1430	A	8	H	1	1.5	1.5	A-8-1	60.6	62.1	60.6	62.1	3	1
346	U1430	A	8	H	2	1.5	1.5	A-8-2	62.1	63.6	61.35	62.1	1	5
346	U1430	A	8	H	3	1.5	1.5	A-8-3	63.6	65.1	62.6	63.6	0	5
346	U1430	A	8	H	4	1.5	1.5	A-8-4	65.1	66.6	63.98	65.1	0	5
346	U1430	A	8	H	5	1.5	1.5	A-8-5	66.6	68.1	65.4	66.6	0	7
346	U1430	A	8	H	6	1.5	1.5	A-8-6	68.1	69.6	66.85	68.1	0	5
346	U1430	A	8	H	7	0.63	0.63	A-8-7	69.6	70.23	69.01	69.6	0	1
346	U1430	A	8	H	CC	0.3	0.3	A-8-CC	70.23	70.53	69.81	70.1	1	0
346	U1430	A	9	H	1	1.5	1.5	A-9-1	70.1	71.6	70.1	71.6	3	4
346	U1430	A	9	H	2	1.5	1.5	A-9-2	71.6	73.1	70.85	71.6	1	3
346	U1430	A	9	H	3	1.5	1.5	A-9-3	73.1	74.6	72.1	73.1	0	7
346	U1430	A	9	H	4	1.5	1.5	A-9-4	74.6	76.1	73.48	74.6	0	10
346	U1430	A	9	H	5	1.5	1.5	A-9-5	76.1	77.6	74.9	76.1	0	5
346	U1430	A	9	H	6	1.5	1.5	A-9-6	77.6	79.1	76.35	77.6	0	1
346	U1430	A	9	H	7	0.57	0.57	A-9-7	79.1	79.67	78.56	79.1	0	1
346	U1430	A	9	H	CC	0.28	0.28	A-9-CC	79.67	79.95	79.33	79.6	1	0
346	U1430	B	1	H	1	1.5	1.5	B-1-1	0	1.5	0	1.5	13	94
346	U1430	B	1	H	2	1.5	1.5	B-1-2	1.5	3	0.75	1.5	4	39
346	U1430	B	1	H	3	1.5	1.5	B-1-3	3	4.5	2	3	3	11
346	U1430	B	1	H	4	1.5	1.5	B-1-4	4.5	6	3.38	4.5	6	8
346	U1430	B	1	H	5	1.5	1.5	B-1-5	6	7.5	4.8	6	5	9
346	U1430	B	1	H	6	0.59	0.59	B-1-6	7.5	8.09	6.95	7.5	0	4
346	U1430	B	1	H	CC	0.18	0.18	B-1-CC	8.09	8.27	7.91	8.09	1	0
346	U1430	B	10	H	1	1.5	1.5	B-10-1	84.3	85.8	84.3	85.8	0	2
346	U1430	B	10	H	2	1.5	1.5	B-10-2	85.8	87.3	85.05	85.8	0	6
346	U1430	B	10	H	3	1.5	1.5	B-10-3	87.3	88.8	86.3	87.3	0	4
346	U1430	B	10	H	4	1.5	1.5	B-10-4	88.8	90.3	87.68	88.8	0	4
346	U1430	B	10	H	5	1.5	1.5	B-10-5	90.3	91.8	89.1	90.3	0	5
346	U1430	B	10	H	6	1.5	1.5	B-10-6	91.8	93.3	90.55	91.8	0	1
346	U1430	B	10	H	7	0.52	0.52	B-10-7	93.3	93.82	92.81	93.3	0	0
346	U1430	B	10	H	CC	0.04	0.04	B-10-CC	93.82	93.86	93.76	93.8	1	0	ALL CC GIVEN TO PAL
346	U1430	B	11	H	1	1.5	1.5	B-11-1	93.8	95.3	93.8	95.3	0	0
346	U1430	B	11	H	2	1.5	1.5	B-11-2	95.3	96.8	94.55	95.3	0	5
346	U1430	B	11	H	3	1.5	1.5	B-11-3	96.8	98.3	95.8	96.8	0	4
346	U1430	B	11	H	4	1.5	1.5	B-11-4	98.3	99.8	97.18	98.3	0	4
346	U1430	B	11	H	5	1.5	1.5	B-11-5	99.8	101.3	98.6	99.8	0	6
346	U1430	B	11	H	6	1.5	1.5	B-11-6	101.3	102.8	100.05	101.3	0	3
346	U1430	B	11	H	7	0.53	0.53	B-11-7	102.8	103.33	102.3	102.8	0	0
346	U1430	B	11	H	CC	0.28	0.28	B-11-CC	103.33	103.61	103.03	103.3	1	0
346	U1430	B	12	H	1	1.5	1.5	B-12-1	103.3	104.8	103.3	104.8	0	1
346	U1430	B	12	H	2	1.5	1.5	B-12-2	104.8	106.3	104.05	104.8	0	5
346	U1430	B	12	H	3	1.5	1.5	B-12-3	106.3	107.8	105.3	106.3	0	4
346	U1430	B	12	H	4	1.5	1.5	B-12-4	107.8	109.3	106.68	107.8	0	4
346	U1430	B	12	H	5	1.5	1.5	B-12-5	109.3	110.8	108.1	109.3	0	6
346	U1430	B	12	H	6	1.5	1.5	B-12-6	110.8	112.3	109.55	110.8	0	3
346	U1430	B	12	H	7	0.59	0.59	B-12-7	112.3	112.89	111.75	112.3	0	0
346	U1430	B	12	H	CC	0.24	0.24	B-12-CC	112.89	113.13	112.57	112.8	1	0
346	U1430	B	13	H	1	1.5	1.5	B-13-1	112.8	114.3	112.8	114.3	0	0
346	U1430	B	13	H	2	1.5	1.5	B-13-2	114.3	115.8	113.55	114.3	0	1
346	U1430	B	13	H	3	1.5	1.5	B-13-3	115.8	117.3	114.8	115.8	0	0
346	U1430	B	13	H	4	1.5	1.5	B-13-4	117.3	118.8	116.18	117.3	0	0
346	U1430	B	13	H	5	1.5	1.5	B-13-5	118.8	120.3	117.6	118.8	0	1
346	U1430	B	13	H	6	1.5	1.5	B-13-6	120.3	121.8	119.05	120.3	0	0
346	U1430	B	13	H	7	0.6	0.6	B-13-7	121.8	122.4	121.24	121.8	0	0
346	U1430	B	13	H	CC	0.29	0.29	B-13-CC	122.4	122.69	122.02	122.3	1	0
346	U1430	B	14	H	1	1.5	1.5	B-14-1	122.3	123.8	122.3	123.8	0	0
346	U1430	B	14	H	2	1.5	1.5	B-14-2	123.8	125.3	123.05	123.8	0	1
346	U1430	B	14	H	3	1.5	1.5	B-14-3	125.3	126.8	124.3	125.3	0	0
346	U1430	B	14	H	4	1.5	1.5	B-14-4	126.8	128.3	125.68	126.8	0	0
346	U1430	B	14	H	5	1.5	1.5	B-14-5	128.3	129.8	127.1	128.3	0	1
346	U1430	B	14	H	6	1.31	1.31	B-14-6	129.8	131.11	128.68	129.8	0	0
346	U1430	B	14	H	7	0.64	0.64	B-14-7	131.11	131.75	130.51	131.11	0	0
346	U1430	B	14	H	CC	0.19	0.19	B-14-CC	131.75	131.94	131.56	131.75	1	0
346	U1430	B	15	H	1	1.5	1.5	B-15-1	131.8	133.3	131.8	133.3	0	1
346	U1430	B	15	H	2	1.5	1.5	B-15-2	133.3	134.8	132.55	133.3	0	0
346	U1430	B	15	H	3	1.5	1.5	B-15-3	134.8	136.3	133.8	134.8	0	0
346	U1430	B	15	H	4	1.5	1.5	B-15-4	136.3	137.8	135.18	136.3	0	1
346	U1430	B	15	H	5	1.5	1.5	B-15-5	137.8	139.3	136.6	137.8	0	0
346	U1430	B	15	H	6	1.5	1.5	B-15-6	139.3	140.8	138.05	139.3	0	0
346	U1430	B	15	H	7	0.64	0.64	B-15-7	140.8	141.44	140.2	140.8	0	0
346	U1430	B	16	H	1	1.5	1.5	B-16-1	141.3	142.8	141.3	142.8	0	0
346	U1430	B	16	H	2	1.5	1.5	B-16-2	142.8	144.3	142.05	142.8	0	0
346	U1430	B	16	H	3	1.5	1.5	B-16-3	144.3	145.8	143.3	144.3	0	0
346	U1430	B	16	H	4	1.5	1.5	B-16-4	145.8	147.3	144.68	145.8	0	0
346	U1430	B	16	H	5	1.5	1.5	B-16-5	147.3	148.8	146.1	147.3	0	0
346	U1430	B	16	H	6	1.5	1.5	B-16-6	148.8	150.3	147.55	148.8	0	0
346	U1430	B	16	H	7	0.6	0.6	B-16-7	150.3	150.9	149.74	150.3	0	0
346	U1430	B	16	H	CC	0.08	0.08	B-16-CC	150.9	150.98	150.72	150.8	0	0
346	U1430	B	17	H	1	1.5	1.5	B-17-1	150.8	152.3	150.8	152.3	0	0
346	U1430	B	17	H	2	1.5	1.5	B-17-2	152.3	153.8	151.55	152.3	0	0
346	U1430	B	17	H	3	1.5	1.5	B-17-3	153.8	155.3	152.8	153.8	0	0
346	U1430	B	17	H	4	1.5	1.5	B-17-4	155.3	156.8	154.18	155.3	0	0
346	U1430	B	17	H	5	1.5	1.5	B-17-5	156.8	158.3	155.6	156.8	0	0
346	U1430	B	17	H	6	1.5	1.5	B-17-6	158.3	159.8	157.05	158.3	0	0
346	U1430	B	17	H	7	0.63	0.63	B-17-7	159.8	160.43	159.21	159.8	0	0
346	U1430	B	17	H	CC	0.27	0.27	B-17-CC	160.43	160.7	160.04	160.3	0	0
346	U1430	B	18	H	1	1.5	1.5	B-18-1	160.3	161.8	160.3	161.8	0	0
346	U1430	B	18	H	2	1.5	1.5	B-18-2	161.8	163.3	161.05	161.8	0	0
346	U1430	B	18	H	3	1.5	1.5	B-18-3	163.3	164.8	162.3	163.3	0	0
346	U1430	B	18	H	4	1.5	1.5	B-18-4	164.8	166.3	163.68	164.8	0	0
346	U1430	B	18	H	5	1.5	1.5	B-18-5	166.3	167.8	165.1	166.3	0	0
346	U1430	B	18	H	6	1.5	1.5	B-18-6	167.8	169.3	166.55	167.8	0	0
346	U1430	B	18	H	7	0.62	0.62	B-18-7	169.3	169.92	168.72	169.3	0	0
346	U1430	B	18	H	CC	0.12	0.12	B-18-CC	169.92	170.04	169.68	169.8	0	0
346	U1430	B	19	H	1	1.5	1.5	B-19-1	169.8	171.3	169.8	171.3	0	0
346	U1430	B	19	H	2	1.5	1.5	B-19-2	171.3	172.8	170.55	171.3	0	0
346	U1430	B	19	H	3	1.5	1.5	B-19-3	172.8	174.3	171.8	172.8	0	0
346	U1430	B	19	H	4	1.5	1.5	B-19-4	174.3	175.8	173.18	174.3	0	0
346	U1430	B	19	H	5	1.5	1.5	B-19-5	175.8	177.3	174.6	175.8	0	0
346	U1430	B	19	H	6	1	1	B-19-6	177.3	178.3	176.42	177.3	0	0
346	U1430	B	19	H	7	0.78	0.78	B-19-7	178.3	179.08	177.58	178.3	0	0
346	U1430	B	2	H	1	1.5	1.5	B-2-1	8.3	9.8	8.3	9.8	0	7
346	U1430	B	2	H	2	1.5	1.5	B-2-2	9.8	11.3	9.05	9.8	0	9
346	U1430	B	2	H	3	1.5	1.5	B-2-3	11.3	12.8	10.3	11.3	0	9
346	U1430	B	2	H	4	1.5	1.5	B-2-4	12.8	14.3	11.68	12.8	0	8
346	U1430	B	2	H	5	1.5	1.5	B-2-5	14.3	15.8	13.1	14.3	0	10
346	U1430	B	2	H	6	1.5	1.5	B-2-6	15.8	17.3	14.55	15.8	0	8
346	U1430	B	2	H	7	0.59	0.59	B-2-7	17.3	17.89	16.75	17.3	0	0
346	U1430	B	2	H	CC	0.14	0.14	B-2-CC	17.89	18.03	17.66	17.8	1	0
346	U1430	B	20	H	1	1.5	1.5	B-20-1	179.3	180.8	179.3	180.8	0	0
346	U1430	B	20	H	2	1.5	1.5	B-20-2	180.8	182.3	180.05	180.8	0	0
346	U1430	B	20	H	3	1.5	1.5	B-20-3	182.3	183.8	181.3	182.3	0	0
346	U1430	B	20	H	4	1.5	1.5	B-20-4	183.8	185.3	182.68	183.8	0	0
346	U1430	B	20	H	5	1.5	1.5	B-20-5	185.3	186.8	184.1	185.3	0	0
346	U1430	B	20	H	6	1.47	1.47	B-20-6	186.8	188.27	185.57	186.8	0	0
346	U1430	B	20	H	7	0.55	0.55	B-20-7	188.27	188.82	187.75	188.27	0	0	Crushed liner
346	U1430	B	20	H	CC	0.1	0.1	B-20-CC	188.82	188.92	188.7	188.8	0	0
346	U1430	B	21	H	1	1.5	1.5	B-21-1	188.8	190.3	188.8	190.3	0	0
346	U1430	B	21	H	2	1.5	1.5	B-21-2	190.3	191.8	189.55	190.3	0	0
346	U1430	B	21	H	3	1.5	1.5	B-21-3	191.8	193.3	190.8	191.8	0	0
346	U1430	B	21	H	4	1.5	1.5	B-21-4	193.3	194.8	192.18	193.3	0	0
346	U1430	B	21	H	5	1.5	1.5	B-21-5	194.8	196.3	193.6	194.8	0	0
346	U1430	B	21	H	6	1.48	1.48	B-21-6	196.3	197.78	195.06	196.3	0	0	Crushed liner
346	U1430	B	21	H	7	0.65	0.65	B-21-7	197.78	198.43	197.17	197.78	0	0
346	U1430	B	22	H	1	1.5	1.5	B-22-1	198.3	199.8	198.3	199.8	0	0
346	U1430	B	22	H	2	1.5	1.5	B-22-2	199.8	201.3	199.05	199.8	0	0
346	U1430	B	22	H	3	1.5	1.5	B-22-3	201.3	202.8	200.3	201.3	0	0
346	U1430	B	22	H	4	1.5	1.5	B-22-4	202.8	204.3	201.68	202.8	0	0
346	U1430	B	22	H	5	1.5	1.5	B-22-5	204.3	205.8	203.1	204.3	0	0
346	U1430	B	22	H	6	1.5	1.5	B-22-6	205.8	207.3	204.55	205.8	0	0
346	U1430	B	22	H	7	0.64	0.64	B-22-7	207.3	207.94	206.7	207.3	0	0
346	U1430	B	22	H	CC	0.06	0.06	B-22-CC	207.94	208	207.74	207.8	0	0
346	U1430	B	23	H	1	1.5	1.5	B-23-1	207.8	209.3	207.8	209.3	0	1
346	U1430	B	23	H	2	1.5	1.5	B-23-2	209.3	210.8	208.55	209.3	0	0
346	U1430	B	23	H	3	1.5	1.5	B-23-3	210.8	212.3	209.8	210.8	0	0
346	U1430	B	23	H	4	1.5	1.5	B-23-4	212.3	213.8	211.18	212.3	0	0
346	U1430	B	23	H	5	1.5	1.5	B-23-5	213.8	215.3	212.6	213.8	0	0
346	U1430	B	23	H	6	1.5	1.5	B-23-6	215.3	216.8	214.05	215.3	0	0
346	U1430	B	23	H	7	0.62	0.62	B-23-7	216.8	217.42	216.22	216.8	0	0
346	U1430	B	23	H	CC	0.1	0.1	B-23-CC	217.42	217.52	217.2	217.3	0	0
346	U1430	B	24	H	1	1.5	1.5	B-24-1	217.3	218.8	217.3	218.8	0	0
346	U1430	B	24	H	2	1.5	1.5	B-24-2	218.8	220.3	218.05	218.8	0	0
346	U1430	B	24	H	3	1.5	1.5	B-24-3	220.3	221.8	219.3	220.3	0	0
346	U1430	B	24	H	4	1.5	1.5	B-24-4	221.8	223.3	220.68	221.8	0	0
346	U1430	B	24	H	5	1.5	1.5	B-24-5	223.3	224.8	222.1	223.3	0	0
346	U1430	B	24	H	6	1.5	1.5	B-24-6	224.8	226.3	223.55	224.8	0	0
346	U1430	B	24	H	7	0.65	0.65	B-24-7	226.3	226.95	225.69	226.3	0	0
346	U1430	B	24	H	CC	0.06	0.06	B-24-CC	226.95	227.01	226.74	226.8	0	0
346	U1430	B	25	H	1	1.5	1.5	B-25-1	226.8	228.3	226.8	228.3	0	0
346	U1430	B	25	H	2	1.5	1.5	B-25-2	228.3	229.8	227.55	228.3	0	0
346	U1430	B	25	H	3	1.5	1.5	B-25-3	229.8	231.3	228.8	229.8	0	0
346	U1430	B	25	H	4	1.5	1.5	B-25-4	231.3	232.8	230.18	231.3	0	0
346	U1430	B	25	H	5	1.11	1.11	B-25-5	232.8	233.91	231.86	232.8	0	0
346	U1430	B	25	H	6	0.54	0.54	B-25-6	233.91	234.45	233.41	233.91	0	0
346	U1430	B	25	H	CC	0.15	0.15	B-25-CC	234.45	234.6	234.3	234.45	0	0
346	U1430	B	26	H	1	1.5	1.5	B-26-1	234.6	236.1	234.6	236.1	0	0
346	U1430	B	26	H	2	1.5	1.5	B-26-2	236.1	237.6	235.35	236.1	0	0
346	U1430	B	26	H	3	1.12	1.12	B-26-3	237.6	238.72	236.78	237.6	0	0
346	U1430	B	26	H	4	0.63	0.63	B-26-4	238.72	239.35	238.17	238.72	0	0
346	U1430	B	26	H	CC	0.21	0.21	B-26-CC	239.35	239.56	239.1	239.3	0	0
346	U1430	B	27	H	1	1.5	1.5	B-27-1	239.3	240.8	239.3	240.8	0	0
346	U1430	B	27	H	2	1.5	1.5	B-27-2	240.8	242.3	240.05	240.8	0	4
346	U1430	B	27	H	3	1.12	1.12	B-27-3	242.3	243.42	241.48	242.3	0	0
346	U1430	B	27	H	4	0.63	0.63	B-27-4	243.42	244.05	242.87	243.42	0	0
346	U1430	B	27	H	CC	0.37	0.37	B-27-CC	244.05	244.42	243.66	244	0	0
346	U1430	B	28	H	1	0.53	0.53	B-28-1	244	244.53	244	244.53	0	1	Mud with a pudding like consistency
346	U1430	B	28	H	2	1.5	1.5	B-28-2	244.53	246.03	244.14	244.53	1	0	Mud with a pudding like consistency
346	U1430	B	28	H	3	0.79	0.79	B-28-3	246.03	246.82	245.44	246	0	0	Mud with a pudding like consistency
346	U1430	B	28	H	4	0.86	0.86	B-28-4	246.82	247.68	245.53	246	0	0	Mud with a pudding like consistency
346	U1430	B	29	X	CC	0.7	0.7	B-29-CC	246	246.7	246	246.7	1	0
346	U1430	B	3	H	1	1.5	1.5	B-3-1	17.8	19.3	17.8	19.3	0	5
346	U1430	B	3	H	2	1.5	1.5	B-3-2	19.3	20.8	18.55	19.3	0	6
346	U1430	B	3	H	3	1.5	1.5	B-3-3	20.8	22.3	19.8	20.8	0	7
346	U1430	B	3	H	4	1.5	1.5	B-3-4	22.3	23.8	21.18	22.3	0	4
346	U1430	B	3	H	5	1.5	1.5	B-3-5	23.8	25.3	22.6	23.8	0	5
346	U1430	B	3	H	6	1.5	1.5	B-3-6	25.3	26.8	24.05	25.3	0	3
346	U1430	B	3	H	7	0.59	0.59	B-3-7	26.8	27.39	26.25	26.8	0	0
346	U1430	B	3	H	CC	0.19	0.19	B-3-CC	27.39	27.58	27.12	27.3	1	0
346	U1430	B	30	X	CC	0.69	0.69	B-30-CC	247	247.69	247	247.69	0	1
346	U1430	B	31	X	1	0.99	0.99	B-31-1	248	248.99	248	248.99	0	7
346	U1430	B	32	X	1	1.49	1.49	B-32-1	250	251.49	250	251.49	0	18
346	U1430	B	32	X	CC	0.47	0.47	B-32-CC	251.49	251.96	251.13	251.49	0	0
346	U1430	B	33	X	1	0.99	0.99	B-33-1	255.7	256.69	255.7	256.69	0	12
346	U1430	B	36	X	1	0.61	0.61	B-36-1	272.4	273.01	272.4	273.01	0	1
346	U1430	B	37	H	1	0.92	0.92	B-37-1	274.1	275.02	274.1	275	0	3
346	U1430	B	4	H	1	1.5	1.5	B-4-1	27.3	28.8	27.3	28.8	0	4
346	U1430	B	4	H	2	1.5	1.5	B-4-2	28.8	30.3	28.05	28.8	0	7
346	U1430	B	4	H	3	1.5	1.5	B-4-3	30.3	31.8	29.3	30.3	0	7
346	U1430	B	4	H	4	1.5	1.5	B-4-4	31.8	33.3	30.68	31.8	0	7
346	U1430	B	4	H	5	1.5	1.5	B-4-5	33.3	34.8	32.1	33.3	0	15
346	U1430	B	4	H	6	1.4	1.4	B-4-6	34.8	36.2	33.62	34.8	0	10
346	U1430	B	4	H	7	0.53	0.53	B-4-7	36.2	36.73	35.7	36.2	0	0
346	U1430	B	4	H	CC	0.21	0.21	B-4-CC	36.73	36.94	36.52	36.73	1	0
346	U1430	B	5	H	1	1.5	1.5	B-5-1	36.8	38.3	36.8	38.3	0	10
346	U1430	B	5	H	2	1.5	1.5	B-5-2	38.3	39.8	37.55	38.3	0	15
346	U1430	B	5	H	3	1.5	1.5	B-5-3	39.8	41.3	38.8	39.8	0	5
346	U1430	B	5	H	4	1.5	1.5	B-5-4	41.3	42.8	40.18	41.3	0	5
346	U1430	B	5	H	5	1.5	1.5	B-5-5	42.8	44.3	41.6	42.8	1	5
346	U1430	B	5	H	6	1.31	1.31	B-5-6	44.3	45.61	43.18	44.3	0	14
346	U1430	B	5	H	7	0.58	0.58	B-5-7	45.61	46.19	45.07	45.61	0	2
346	U1430	B	5	H	CC	0.18	0.18	B-5-CC	46.19	46.37	46.01	46.19	1	0
346	U1430	B	6	H	1	1.5	1.5	B-6-1	46.3	47.8	46.3	47.8	0	3
346	U1430	B	6	H	2	1.5	1.5	B-6-2	47.8	49.3	47.05	47.8	0	16
346	U1430	B	6	H	3	1.5	1.5	B-6-3	49.3	50.8	48.3	49.3	0	6
346	U1430	B	6	H	4	1.5	1.5	B-6-4	50.8	52.3	49.68	50.8	0	6
346	U1430	B	6	H	5	1.5	1.5	B-6-5	52.3	53.8	51.1	52.3	0	6
346	U1430	B	6	H	6	1.21	1.21	B-6-6	53.8	55.01	52.76	53.8	0	5
346	U1430	B	6	H	7	0.64	0.64	B-6-7	55.01	55.65	54.41	55.01	0	1
346	U1430	B	6	H	CC	0.22	0.22	B-6-CC	55.65	55.87	55.44	55.65	1	0
346	U1430	B	7	H	1	1.5	1.5	B-7-1	55.8	57.3	55.8	57.3	0	7
346	U1430	B	7	H	2	1.5	1.5	B-7-2	57.3	58.8	56.55	57.3	0	15
346	U1430	B	7	H	3	1.5	1.5	B-7-3	58.8	60.3	57.8	58.8	0	14
346	U1430	B	7	H	4	1.5	1.5	B-7-4	60.3	61.8	59.18	60.3	0	14
346	U1430	B	7	H	5	1.5	1.5	B-7-5	61.8	63.3	60.6	61.8	0	4
346	U1430	B	7	H	6	1.5	1.5	B-7-6	63.3	64.8	62.05	63.3	0	4
346	U1430	B	7	H	7	0.6	0.6	B-7-7	64.8	65.4	64.24	64.8	0	0
346	U1430	B	7	H	CC	0.16	0.16	B-7-CC	65.4	65.56	65.14	65.3	1	0
346	U1430	B	8	H	1	1.5	1.5	B-8-1	65.3	66.8	65.3	66.8	0	0
346	U1430	B	8	H	2	1.5	1.5	B-8-2	66.8	68.3	66.05	66.8	0	1
346	U1430	B	8	H	3	1.5	1.5	B-8-3	68.3	69.8	67.3	68.3	0	3
346	U1430	B	8	H	4	1.5	1.5	B-8-4	69.8	71.3	68.68	69.8	0	4
346	U1430	B	8	H	5	1.5	1.5	B-8-5	71.3	72.8	70.1	71.3	0	7
346	U1430	B	8	H	6	1.5	1.5	B-8-6	72.8	74.3	71.55	72.8	0	4
346	U1430	B	8	H	7	0.57	0.57	B-8-7	74.3	74.87	73.76	74.3	0	0
346	U1430	B	8	H	CC	0.25	0.25	B-8-CC	74.87	75.12	74.56	74.8	1	0
346	U1430	B	9	H	1	1.5	1.5	B-9-1	74.8	76.3	74.8	76.3	0	2
346	U1430	B	9	H	2	1.5	1.5	B-9-2	76.3	77.8	75.55	76.3	0	6
346	U1430	B	9	H	3	1.5	1.5	B-9-3	77.8	79.3	76.8	77.8	0	4
346	U1430	B	9	H	4	1.5	1.5	B-9-4	79.3	80.8	78.18	79.3	0	5
346	U1430	B	9	H	5	1.5	1.5	B-9-5	80.8	82.3	79.6	80.8	0	5
346	U1430	B	9	H	6	1.5	1.5	B-9-6	82.3	83.8	81.05	82.3	0	2
346	U1430	B	9	H	7	0.53	0.53	B-9-7	83.8	84.33	83.3	83.8	0	0
346	U1430	B	9	H	CC	0.27	0.27	B-9-CC	84.33	84.6	84.04	84.3	1	0
346	U1430	C	1	H	1	1.5	1.5	C-1-1	0	1.5	0	1.5	1	1
346	U1430	C	1	H	2	1.5	1.5	C-1-2	1.5	3	1.5	3	0	0
346	U1430	C	1	H	3	0.81	0.81	C-1-3	3	3.81	3	3.81	0	1
346	U1430	C	1	H	4	0.81	0.81	C-1-4	3.81	4.62	3.81	4.62	0	0
346	U1430	C	1	H	CC	0.16	0.16	C-1-CC	4.62	4.78	4.62	4.78	1	0
346	U1430	C	10	H	1	1.5	1.5	C-10-1	80.8	82.3	80.8	82.26	0	0
346	U1430	C	10	H	2	1.5	1.5	C-10-2	82.3	83.8	82.26	83.71	0	0
346	U1430	C	10	H	3	1.5	1.5	C-10-3	83.8	85.3	83.71	85.17	0	0
346	U1430	C	10	H	4	1.5	1.5	C-10-4	85.3	86.8	85.17	86.63	0	0
346	U1430	C	10	H	5	1.5	1.5	C-10-5	86.8	88.3	86.63	88.09	0	0
346	U1430	C	10	H	6	1.5	1.5	C-10-6	88.3	89.8	88.09	89.54	0	0
346	U1430	C	10	H	7	0.58	0.58	C-10-7	89.8	90.38	89.54	90.11	0	0
346	U1430	C	10	H	CC	0.2	0.2	C-10-CC	90.38	90.58	90.11	90.3	0	0
346	U1430	C	11	H	1	1.5	1.5	C-11-1	90.3	91.8	90.3	91.74	0	0
346	U1430	C	11	H	2	1.5	1.5	C-11-2	91.8	93.3	91.74	93.19	0	0
346	U1430	C	11	H	3	1.51	1.51	C-11-3	93.3	94.81	93.19	94.64	0	0
346	U1430	C	11	H	4	1.5	1.5	C-11-4	94.81	96.31	94.64	96.08	0	0
346	U1430	C	11	H	5	1.5	1.5	C-11-5	96.31	97.81	96.08	97.53	0	0
346	U1430	C	11	H	6	1.5	1.5	C-11-6	97.81	99.31	97.53	98.97	0	0
346	U1430	C	11	H	7	0.68	0.68	C-11-7	99.31	99.99	98.97	99.63	0	0
346	U1430	C	11	H	CC	0.18	0.18	C-11-CC	99.99	100.17	99.63	99.8	0	0
346	U1430	C	12	H	1	1.5	1.5	C-12-1	99.8	101.3	99.8	101.26	0	0
346	U1430	C	12	H	2	1.5	1.5	C-12-2	101.3	102.8	101.26	102.71	0	0
346	U1430	C	12	H	3	1.5	1.5	C-12-3	102.8	104.3	102.71	104.17	0	0
346	U1430	C	12	H	4	1.5	1.5	C-12-4	104.3	105.8	104.17	105.63	0	0
346	U1430	C	12	H	5	1.5	1.5	C-12-5	105.8	107.3	105.63	107.09	0	0
346	U1430	C	12	H	6	1.5	1.5	C-12-6	107.3	108.8	107.09	108.54	0	0
346	U1430	C	12	H	7	0.63	0.63	C-12-7	108.8	109.43	108.54	109.16	0	0
346	U1430	C	12	H	CC	0.15	0.15	C-12-CC	109.43	109.58	109.16	109.3	0	0
346	U1430	C	13	H	1	1.5	1.5	C-13-1	109.3	110.8	109.3	110.78	0	0
346	U1430	C	13	H	2	1.5	1.5	C-13-2	110.8	112.3	110.78	112.25	0	0
346	U1430	C	13	H	3	1.5	1.5	C-13-3	112.3	113.8	112.25	113.72	0	0
346	U1430	C	13	H	4	1.5	1.5	C-13-4	113.8	115.3	113.72	115.2	0	0
346	U1430	C	13	H	5	1.5	1.5	C-13-5	115.3	116.8	115.2	116.68	0	0
346	U1430	C	13	H	6	1.5	1.5	C-13-6	116.8	118.3	116.68	118.15	0	0
346	U1430	C	13	H	7	0.53	0.53	C-13-7	118.3	118.83	118.15	118.67	0	0
346	U1430	C	13	H	CC	0.13	0.13	C-13-CC	118.83	118.96	118.67	118.8	0	0
346	U1430	C	14	H	1	1.5	1.5	C-14-1	118.8	120.3	118.8	120.22	0	0
346	U1430	C	14	H	2	1.5	1.5	C-14-2	120.3	121.8	120.22	121.63	0	0
346	U1430	C	14	H	3	1.01	1.01	C-14-3	121.8	122.81	121.63	122.58	0	0
346	U1430	C	14	H	4	0.69	0.69	C-14-4	122.81	123.5	122.58	123.24	0	0
346	U1430	C	14	H	CC	0.28	0.28	C-14-CC	123.5	123.78	123.24	123.5	0	0
346	U1430	C	15	H	1	1.5	1.5	C-15-1	123.5	125	123.5	124.94	0	0
346	U1430	C	15	H	2	1.5	1.5	C-15-2	125	126.5	124.94	126.38	0	0
346	U1430	C	15	H	3	1.5	1.5	C-15-3	126.5	128	126.38	127.83	0	0
346	U1430	C	15	H	4	1.5	1.5	C-15-4	128	129.5	127.83	129.27	0	0
346	U1430	C	15	H	5	1.5	1.5	C-15-5	129.5	131	129.27	130.71	0	0
346	U1430	C	15	H	6	1.5	1.5	C-15-6	131	132.5	130.71	132.15	0	0
346	U1430	C	15	H	7	0.66	0.66	C-15-7	132.5	133.16	132.15	132.79	0	0
346	U1430	C	15	H	CC	0.22	0.22	C-15-CC	133.16	133.38	132.79	133	0	0
346	U1430	C	16	H	1	1.5	1.5	C-16-1	133	134.5	133	134.43	0	0
346	U1430	C	16	H	2	1.5	1.5	C-16-2	134.5	136	134.43	135.86	0	0
346	U1430	C	16	H	3	1.5	1.5	C-16-3	136	137.5	135.86	137.3	0	0
346	U1430	C	16	H	4	1.5	1.5	C-16-4	137.5	139	137.3	138.73	0	0
346	U1430	C	16	H	5	1.5	1.5	C-16-5	139	140.5	138.73	140.16	0	0
346	U1430	C	16	H	6	1.5	1.5	C-16-6	140.5	142	140.16	141.59	0	0
346	U1430	C	16	H	7	0.66	0.66	C-16-7	142	142.66	141.59	142.22	0	0
346	U1430	C	16	H	CC	0.29	0.29	C-16-CC	142.66	142.95	142.22	142.5	0	0
346	U1430	C	17	H	1	1.5	1.5	C-17-1	142.5	144	142.5	143.95	0	0
346	U1430	C	17	H	2	1.5	1.5	C-17-2	144	145.5	143.95	145.39	0	0
346	U1430	C	17	H	3	1.5	1.5	C-17-3	145.5	147	145.39	146.84	0	0
346	U1430	C	17	H	4	1.5	1.5	C-17-4	147	148.5	146.84	148.29	0	0
346	U1430	C	17	H	5	1.5	1.5	C-17-5	148.5	150	148.29	149.73	0	0
346	U1430	C	17	H	6	1.5	1.5	C-17-6	150	151.5	149.73	151.18	0	0
346	U1430	C	17	H	7	0.63	0.63	C-17-7	151.5	152.13	151.18	151.79	0	0
346	U1430	C	17	H	CC	0.22	0.22	C-17-CC	152.13	152.35	151.79	152	0	0
346	U1430	C	18	H	1	1.5	1.5	C-18-1	152	153.5	152	153.44	0	0
346	U1430	C	18	H	2	1.5	1.5	C-18-2	153.5	155	153.44	154.88	0	0
346	U1430	C	18	H	3	1.5	1.5	C-18-3	155	156.5	154.88	156.32	0	0
346	U1430	C	18	H	4	1.5	1.5	C-18-4	156.5	158	156.32	157.76	0	0
346	U1430	C	18	H	5	1.5	1.5	C-18-5	158	159.5	157.76	159.2	0	0
346	U1430	C	18	H	6	1.5	1.5	C-18-6	159.5	161	159.2	160.64	0	0
346	U1430	C	18	H	7	0.62	0.62	C-18-7	161	161.62	160.64	161.24	0	0
346	U1430	C	18	H	CC	0.27	0.27	C-18-CC	161.62	161.89	161.24	161.5	0	0
346	U1430	C	19	H	1	1.5	1.5	C-19-1	161.5	163	161.5	162.93	0	0
346	U1430	C	19	H	2	1.5	1.5	C-19-2	163	164.5	162.93	164.36	0	0
346	U1430	C	19	H	3	1.5	1.5	C-19-3	164.5	166	164.36	165.8	0	0
346	U1430	C	19	H	4	1.5	1.5	C-19-4	166	167.5	165.8	167.23	0	0
346	U1430	C	19	H	5	1.5	1.5	C-19-5	167.5	169	167.23	168.66	0	0
346	U1430	C	19	H	6	1.5	1.5	C-19-6	169	170.5	168.66	170.09	0	0
346	U1430	C	19	H	7	0.71	0.71	C-19-7	170.5	171.21	170.09	170.77	0	0
346	U1430	C	19	H	CC	0.24	0.24	C-19-CC	171.21	171.45	170.77	171	0	0
346	U1430	C	2	H	1	1.5	1.5	C-2-1	4.8	6.3	4.8	6.28	0	1
346	U1430	C	2	H	2	1.5	1.5	C-2-2	6.3	7.8	6.28	7.77	0	1
346	U1430	C	2	H	3	1.5	1.5	C-2-3	7.8	9.3	7.77	9.25	0	1
346	U1430	C	2	H	4	1.43	1.43	C-2-4	9.3	10.73	9.25	10.67	0	0
346	U1430	C	2	H	5	1.49	1.49	C-2-5	10.73	12.22	10.67	12.14	0	0
346	U1430	C	2	H	6	1.5	1.5	C-2-6	12.22	13.72	12.14	13.63	0	0
346	U1430	C	2	H	7	0.53	0.53	C-2-7	13.72	14.25	13.63	14.15	0	0
346	U1430	C	2	H	CC	0.15	0.15	C-2-CC	14.25	14.4	14.15	14.3	1	0
346	U1430	C	20	H	1	1.5	1.5	C-20-1	171	172.5	171	172.46	0	0
346	U1430	C	20	H	2	1.5	1.5	C-20-2	172.5	174	172.46	173.93	0	0
346	U1430	C	20	H	3	1.5	1.5	C-20-3	174	175.5	173.93	175.39	0	0
346	U1430	C	20	H	4	1.5	1.5	C-20-4	175.5	177	175.39	176.85	0	0
346	U1430	C	20	H	5	1.5	1.5	C-20-5	177	178.5	176.85	178.32	0	0
346	U1430	C	20	H	6	1.4	1.4	C-20-6	178.5	179.9	178.32	179.68	0	0
346	U1430	C	20	H	7	0.58	0.58	C-20-7	179.9	180.48	179.68	180.25	0	0
346	U1430	C	20	H	CC	0.26	0.26	C-20-CC	180.48	180.74	180.25	180.5	0	0
346	U1430	C	21	H	1	1.5	1.5	C-21-1	180.5	182	180.5	181.94	0	0
346	U1430	C	21	H	2	1.5	1.5	C-21-2	182	183.5	181.94	183.39	0	0
346	U1430	C	21	H	3	1.5	1.5	C-21-3	183.5	185	183.39	184.84	0	0
346	U1430	C	21	H	4	1.5	1.5	C-21-4	185	186.5	184.84	186.28	0	0
346	U1430	C	21	H	5	1.5	1.5	C-21-5	186.5	188	186.28	187.73	0	0
346	U1430	C	21	H	6	1.5	1.5	C-21-6	188	189.5	187.73	189.17	0	0
346	U1430	C	21	H	7	0.63	0.63	C-21-7	189.5	190.13	189.17	189.78	0	0
346	U1430	C	21	H	CC	0.23	0.23	C-21-CC	190.13	190.36	189.78	190	0	0
346	U1430	C	22	H	1	1.5	1.5	C-22-1	190	191.5	190	191.44	0	0
346	U1430	C	22	H	2	1.5	1.5	C-22-2	191.5	193	191.44	192.87	0	0
346	U1430	C	22	H	3	1.5	1.5	C-22-3	193	194.5	192.87	194.31	0	0
346	U1430	C	22	H	4	1.5	1.5	C-22-4	194.5	196	194.31	195.75	0	1
346	U1430	C	22	H	5	1.5	1.5	C-22-5	196	197.5	195.75	197.18	0	0
346	U1430	C	22	H	6	1.5	1.5	C-22-6	197.5	199	197.18	198.62	0	0
346	U1430	C	22	H	7	0.68	0.68	C-22-7	199	199.68	198.62	199.27	0	0
346	U1430	C	22	H	CC	0.24	0.24	C-22-CC	199.68	199.92	199.27	199.5	0	0
346	U1430	C	23	H	1	1.5	1.5	C-23-1	199.5	201	199.5	200.94	0	0
346	U1430	C	23	H	2	1.5	1.5	C-23-2	201	202.5	200.94	202.38	0	1
346	U1430	C	23	H	3	1.5	1.5	C-23-3	202.5	204	202.38	203.82	0	0
346	U1430	C	23	H	4	1.5	1.5	C-23-4	204	205.5	203.82	205.26	0	0
346	U1430	C	23	H	5	1.5	1.5	C-23-5	205.5	207	205.26	206.7	0	2
346	U1430	C	23	H	6	1.5	1.5	C-23-6	207	208.5	206.7	208.14	0	0
346	U1430	C	23	H	7	0.65	0.65	C-23-7	208.5	209.15	208.14	208.76	0	0
346	U1430	C	23	H	CC	0.25	0.25	C-23-CC	209.15	209.4	208.76	209	0	0
346	U1430	C	24	H	1	1.5	1.5	C-24-1	209	210.5	209	210.47	0	0
346	U1430	C	24	H	2	1.5	1.5	C-24-2	210.5	212	210.47	211.95	0	0
346	U1430	C	24	H	3	1.5	1.5	C-24-3	212	213.5	211.95	213.42	0	0
346	U1430	C	24	H	4	1.5	1.5	C-24-4	213.5	215	213.42	214.89	0	0
346	U1430	C	24	H	5	1.5	1.5	C-24-5	215	216.5	214.89	216.37	0	0
346	U1430	C	24	H	6	1.5	1.5	C-24-6	216.5	218	216.37	217.84	0	0
346	U1430	C	24	H	7	0.67	0.67	C-24-7	218	218.67	217.84	218.5	0	0
346	U1430	C	25	H	1	1.5	1.5	C-25-1	218.5	220	218.5	219.99	0	0
346	U1430	C	25	H	2	1.5	1.5	C-25-2	220	221.5	219.99	221.49	0	0
346	U1430	C	25	H	3	1.5	1.5	C-25-3	221.5	223	221.49	222.98	0	0
346	U1430	C	25	H	4	1.5	1.5	C-25-4	223	224.5	222.98	224.47	0	0
346	U1430	C	25	H	5	1.5	1.5	C-25-5	224.5	226	224.47	225.97	0	0
346	U1430	C	25	H	6	1.24	1.24	C-25-6	226	227.24	225.97	227.2	0	0
346	U1430	C	26	H	CC	0.13	0.13	C-26-CC	227.2	227.33	227.2	227.3	1	0
346	U1430	C	27	X	1	0.05	0.05	C-27-1	227.3	227.35	227.3	227.35	1	0	Opal-CT hard layer
346	U1430	C	28	H	1	1.5	1.5	C-28-1	228.8	230.3	228.8	230.26	0	0
346	U1430	C	28	H	2	1.5	1.5	C-28-2	230.3	231.8	230.26	231.72	0	0
346	U1430	C	28	H	3	1.02	1.02	C-28-3	231.8	232.82	231.72	232.72	0	0
346	U1430	C	28	H	4	0.62	0.62	C-28-4	232.82	233.44	232.72	233.32	0	0
346	U1430	C	28	H	CC	0.18	0.18	C-28-CC	233.44	233.62	233.32	233.5	0	0
346	U1430	C	29	H	1	1.5	1.5	C-29-1	233.5	235	233.5	234.9	0	0
346	U1430	C	29	H	2	1.5	1.5	C-29-2	235	236.5	234.9	236.31	0	0
346	U1430	C	29	H	3	1.12	1.12	C-29-3	236.5	237.62	236.31	237.36	0	0
346	U1430	C	29	H	4	0.59	0.59	C-29-4	237.62	238.21	237.36	237.91	0	0
346	U1430	C	29	H	CC	0.31	0.31	C-29-CC	238.21	238.52	237.91	238.2	1	0
346	U1430	C	3	H	1	1.5	1.5	C-3-1	14.3	15.8	14.3	15.74	0	0
346	U1430	C	3	H	2	1.5	1.5	C-3-2	15.8	17.3	15.74	17.18	0	1
346	U1430	C	3	H	3	1.5	1.5	C-3-3	17.3	18.8	17.18	18.62	0	0
346	U1430	C	3	H	4	1.5	1.5	C-3-4	18.8	20.3	18.62	20.06	0	2
346	U1430	C	3	H	5	1.5	1.5	C-3-5	20.3	21.8	20.06	21.5	0	1
346	U1430	C	3	H	6	1.5	1.5	C-3-6	21.8	23.3	21.5	22.94	0	0
346	U1430	C	3	H	7	0.64	0.64	C-3-7	23.3	23.94	22.94	23.55	0	0
346	U1430	C	3	H	CC	0.26	0.26	C-3-CC	23.94	24.2	23.55	23.8	1	0
346	U1430	C	30	H	1	1.5	1.5	C-30-1	238.2	239.7	238.2	239.65	0	0	SHATTERED LINER
346	U1430	C	30	H	2	1.5	1.5	C-30-2	239.7	241.2	239.65	241.1	0	0	SHATTERED LINER
346	U1430	C	30	H	3	1.02	1.02	C-30-3	241.2	242.22	241.1	242.09	0	0	SHATTERED LINER
346	U1430	C	30	H	4	0.63	0.63	C-30-4	242.22	242.85	242.09	242.7	0	0	SHATTERED LINER
346	U1430	C	30	H	CC	0.21	0.21	C-30-CC	242.85	243.06	242.7	242.9	1	0	SHATTERED LINER
346	U1430	C	31	H	1	1.45	1.45	C-31-1	242.9	244.35	242.9	244.35	0	0
346	U1430	C	31	H	CC	0.31	0.31	C-31-CC	244.35	244.66	244.1	244.35	1	0
346	U1430	C	32	H	1	1.5	1.5	C-32-1	244.6	246.1	244.6	246.1	0	1
346	U1430	C	32	H	2	1.5	1.5	C-32-2	246.1	247.6	245.35	246.1	0	0
346	U1430	C	32	H	3	0.84	0.84	C-32-3	247.6	248.44	246.94	247.6	0	0
346	U1430	C	32	H	CC	0.15	0.15	C-32-CC	248.44	248.59	248.3	248.44	1	0
346	U1430	C	33	H	1	0.77	0.77	C-33-1	248.6	249.37	248.6	249.1	0	0	SAND
346	U1430	C	34	H	1	0.92	0.92	C-34-1	249.1	250.02	249.1	250	0	0	SAND
346	U1430	C	4	H	1	1.5	1.5	C-4-1	23.8	25.3	23.8	25.25	0	0
346	U1430	C	4	H	2	1.5	1.5	C-4-2	25.3	26.8	25.25	26.7	0	1
346	U1430	C	4	H	3	1.5	1.5	C-4-3	26.8	28.3	26.7	28.16	1	0
346	U1430	C	4	H	4	1.5	1.5	C-4-4	28.3	29.8	28.16	29.61	0	1
346	U1430	C	4	H	5	1.5	1.5	C-4-5	29.8	31.3	29.61	31.06	0	0
346	U1430	C	4	H	6	1.5	1.5	C-4-6	31.3	32.8	31.06	32.52	0	0
346	U1430	C	4	H	7	0.6	0.6	C-4-7	32.8	33.4	32.52	33.1	0	0
346	U1430	C	4	H	CC	0.21	0.21	C-4-CC	33.4	33.61	33.1	33.3	1	0
346	U1430	C	5	H	1	1.5	1.5	C-5-1	33.3	34.8	33.3	34.74	0	0
346	U1430	C	5	H	2	1.5	1.5	C-5-2	34.8	36.3	34.74	36.18	0	2
346	U1430	C	5	H	3	1.5	1.5	C-5-3	36.3	37.8	36.18	37.63	0	0
346	U1430	C	5	H	4	1.5	1.5	C-5-4	37.8	39.3	37.63	39.07	0	0
346	U1430	C	5	H	5	1.5	1.5	C-5-5	39.3	40.8	39.07	40.51	0	0
346	U1430	C	5	H	6	1.5	1.5	C-5-6	40.8	42.3	40.51	41.95	0	0
346	U1430	C	5	H	7	0.65	0.65	C-5-7	42.3	42.95	41.95	42.58	0	0
346	U1430	C	5	H	CC	0.23	0.23	C-5-CC	42.95	43.18	42.58	42.8	1	0
346	U1430	C	6	H	1	1.5	1.5	C-6-1	42.8	44.3	42.8	44.26	0	0
346	U1430	C	6	H	2	1.5	1.5	C-6-2	44.3	45.8	44.26	45.71	0	0
346	U1430	C	6	H	3	1.5	1.5	C-6-3	45.8	47.3	45.71	47.17	0	0
346	U1430	C	6	H	4	1.5	1.5	C-6-4	47.3	48.8	47.17	48.62	0	0
346	U1430	C	6	H	5	1.5	1.5	C-6-5	48.8	50.3	48.62	50.08	0	0
346	U1430	C	6	H	6	1.5	1.5	C-6-6	50.3	51.8	50.08	51.53	0	0
346	U1430	C	6	H	7	0.52	0.52	C-6-7	51.8	52.32	51.53	52.04	0	0
346	U1430	C	6	H	CC	0.27	0.27	C-6-CC	52.32	52.59	52.04	52.3	1	0
346	U1430	C	7	H	1	1.5	1.5	C-7-1	52.3	53.8	52.3	53.78	0	0
346	U1430	C	7	H	2	1.5	1.5	C-7-2	53.8	55.3	53.78	55.25	0	0
346	U1430	C	7	H	3	1.5	1.5	C-7-3	55.3	56.8	55.25	56.72	0	0
346	U1430	C	7	H	4	1.5	1.5	C-7-4	56.8	58.3	56.72	58.2	0	0
346	U1430	C	7	H	5	1.5	1.5	C-7-5	58.3	59.8	58.2	59.68	0	0
346	U1430	C	7	H	6	1.5	1.5	C-7-6	59.8	61.3	59.68	61.15	0	0
346	U1430	C	7	H	7	0.5	0.5	C-7-7	61.3	61.8	61.15	61.64	0	0
346	U1430	C	7	H	CC	0.16	0.16	C-7-CC	61.8	61.96	61.64	61.8	4	0
346	U1430	C	8	H	1	1.5	1.5	C-8-1	61.8	63.3	61.8	63.22	0	0
346	U1430	C	8	H	2	1.5	1.5	C-8-2	63.3	64.8	63.22	64.64	0	0
346	U1430	C	8	H	3	1.5	1.5	C-8-3	64.8	66.3	64.64	66.06	0	0
346	U1430	C	8	H	4	1.5	1.5	C-8-4	66.3	67.8	66.06	67.48	0	0
346	U1430	C	8	H	5	1.5	1.5	C-8-5	67.8	69.3	67.48	68.9	0	0
346	U1430	C	8	H	6	1.5	1.5	C-8-6	69.3	70.8	68.9	70.32	0	0
346	U1430	C	8	H	7	0.7	0.7	C-8-7	70.8	71.5	70.32	70.99	0	0
346	U1430	C	8	H	CC	0.33	0.33	C-8-CC	71.5	71.83	70.99	71.3	0	0
346	U1430	C	9	H	1	1.5	1.5	C-9-1	71.3	72.8	71.3	72.75	0	0
346	U1430	C	9	H	2	1.5	1.5	C-9-2	72.8	74.3	72.75	74.2	0	0
346	U1430	C	9	H	3	1.5	1.5	C-9-3	74.3	75.8	74.2	75.65	0	0
346	U1430	C	9	H	4	1.5	1.5	C-9-4	75.8	77.3	75.65	77.1	0	0
346	U1430	C	9	H	5	1.5	1.5	C-9-5	77.3	78.8	77.1	78.55	0	0
346	U1430	C	9	H	6	1.5	1.5	C-9-6	78.8	80.3	78.55	80	0	0
346	U1430	C	9	H	7	0.63	0.63	C-9-7	80.3	80.93	80	80.61	0	0
346	U1430	C	9	H	CC	0.2	0.2	C-9-CC	80.93	81.13	80.61	80.8	0	0
